## Reference plasmid pHXB2\_D is an HIV-1 molecular clone that exhibits identical LTRs and a single integration site indicative of an HIV provirus

Alejandro R. Gener<sup>1,2,3,4§</sup>, Wei Zou<sup>5</sup>, Brian T. Foley<sup>6</sup>, Deborah P. Hyink<sup>\*2</sup>, Paul E. Klotman<sup>\*1,2</sup>

<sup>1</sup>Integrative Molecular and Biomedical Sciences Program, Baylor College of Medicine, Houston, Texas, USA

<sup>2</sup>Margaret M. and Albert B. Alkek Department of Medicine, Nephrology, Baylor College of Medicine, Houston, Texas, USA

<sup>3</sup>Department of Genetics, MD Anderson Cancer Center, Houston, Texas, USA

<sup>4</sup>School of Medicine, Universidad Central del Caribe, Bayamón, Puerto Rico, USA

<sup>5</sup>Division of Infectious Diseases, the 1<sup>st</sup> Affiliated Hospital of Nanchang University, Nanchang, Jiangxi, China

<sup>6</sup>Theoretical Biology and Biophysics Group T-6, Los Alamos National Laboratory, Los Alamos, New Mexico, USA

\*Equal contributions.

§Corresponding author: Alejandro R. Gener

One Baylor Plaza

Mail Stop 710

Houston, Texas, 77030, USA

9045715562

[gener@bcm.edu](mailto:gener@bcm.edu) ; [itspronouncedhenner@gmail.com](mailto:itspronouncedhenner@gmail.com)

**Keywords:** HIV-1, reagent verification, nanopore DNA sequencing, provirus, plasmid, sequence variability, resequencing, LTR phasing

1 **Abstract**

2 **Objective:** To compare long-read nanopore DNA sequencing (DNA-seq) with short-read  
3 sequencing-by-synthesis for sequencing a full-length (e.g., non-deletion, nor reporter) HIV-1  
4 model provirus in plasmid pHXB2\_D.

5 **Design:** We sequenced pHXB2\_D and a control plasmid pNL4-3\_gag-pol( $\Delta$ 1443-4553)\_EGFP  
6 with long- and short-read DNA-seq, evaluating sample variability with resequencing (sequencing  
7 and mapping to reference HXB2) and *de novo* viral genome assembly.

8 **Methods:** We prepared pHXB2\_D and pNL4-3\_gag-pol( $\Delta$ 1443-4553)\_EGFP for long-read  
9 nanopore DNA-seq, varying DNA polymerases Taq (Sigma-Aldrich) and Long Amplicon (LA)  
10 Taq (Takara). Nanopore basecallers were compared. After aligning reads to the reference HXB2  
11 to evaluate sample coverage, we looked for variants. We next assembled reads into contigs,  
12 followed by finishing and polishing. We hired an external core to sequence-verify pHXB2\_D  
13 and pNL4-3\_gag-pol( $\Delta$ 1443-4553)\_EGFP with single-end 150 base-long Illumina reads, after  
14 masking sample identity.

15 **Results:** We achieved full-coverage (100%) of HXB2 HIV-1 from 5' to 3' long terminal repeats  
16 (LTRs), with median per-base coverage of over 9000x in one experiment on a single MinION  
17 flow cell. The longest HIV-spanning read to-date was generated, at a length of 11,487 bases,  
18 which included full-length HIV-1 and plasmid backbone with flanking host sequences  
19 supporting a single HXB2 integration event. We discovered 20 single nucleotide variants in  
20 pHXB2\_D compared to reference, verified by short-read DNA sequencing. There were no  
21 variants detected in the HIV-1 segments of pNL4-3\_gag-pol( $\Delta$ 1443-4553)\_EGFP.

22 **Conclusions:** Nanopore sequencing performed as-expected, phasing LTRs, and even covering  
23 full-length HIV. The discovery of variants in a reference plasmid demonstrates the need for

24 sequence verification moving forward, in line with calls from funding agencies for reagent  
25 verification. These results illustrate the utility of long-read DNA-seq to advance the study of  
26 HIV at single integration site resolution.

27

## 28 **Introduction**

29           Much of what we know about human acquired immunodeficiency syndrome (AIDS)  
30 came after isolating the causative agent – the human immunodeficiency virus type 1 (HIV-1) –  
31 and describing the viral genome information content. The HIV-1 isolate HXB2 (also known as  
32 HTLV-III and HIV-1<sub>LAI</sub> or LAV/BRU [1], [2]) was the first full-length replication-competent  
33 HIV genome sequenced [3]. Derivative clones commonly called “HXB2” are still used for *in*  
34 *vitro* infection assays, including RNA (almost always cDNA [4]) sequencing (**Figure 1A** and  
35 **Supplemental Table 1**). Despite the availability of the HXB2 HIV-1 reference sequence [3], no  
36 sequence is available for any complete and readily available HXB2 clone.

37           HIV clones were originally made by choosing non-cutter restriction enzymes to digest  
38 intact proviral sequences upstream and downstream of unknown integration sites from infected  
39 host cells while sparing HIV-1 sequence, followed by ligation into an *E. coli* cloning vector  
40 (plasmid) (**Figure 1B**), allowing for low-error (but not error-free) propagation [5]. These clones  
41 became available before tractable sequencing methods permitted routine sequence verification.  
42 As such, it was uncommon to sequence them. While funding agencies now require investigators  
43 to include in their proposals plans to validate their key reagents, these funders tend to leave the  
44 process up to investigators and may not always follow up on whether a given reagent is ever  
45 actually validated (or revalidated between changes of hand). Investigators do not regularly  
46 validate their clones, in part because there is no universally accepted standard. Instead, a  
47 common practice is to assume a given clone, often kindly gifted from a colleague, is as reported.  
48 As such, we often do not truly know what we have been working with for 35+ years.

49           Making sense of the information from HIV sequencing experiments is complicated by  
50 many factors, including the cycling that all orterviruses [6] undergo between two major states (as

51 infectious virion RNA and integrated proviral DNA **Figure 1B**), repetitive viral sequences like  
52 long terminal repeats (LTRs), non-integrated forms [7], rarity of integration events *in vivo*  
53 (reviewed in [8]), and alternative splicing of viral mRNAs [9]. Short-read DNA sequencing  
54 (<150 base pairs (bp) in most reported experiments, but up to 500 bp for either Illumina  
55 sequencing-by-synthesis or <1,000 bp for chain termination sequencing) provides some  
56 information, but analyses require high coverage and/or extensive effort (non-exhaustive  
57 examples [10], [11]). These factors limit the ability to assign variants to specific loci within each  
58 provirus, as well as at the proviral integration site(s) (reviewed in [12]). Despite progress (HIV  
59 DNA) [13], (HIV RNA) [14], [15], [16], researchers have yet to observe the genome of HIV-1 as  
60 complete provirus (integrated DNA) in a single read, hindering locus-specific studies. To this  
61 end, current long-read DNA sequencing clearly surpasses the limitations of read length of  
62 leading next-generation/short-read sequencing platforms. Here we used the MinION sequencer  
63 to sequence HIV-1 plasmid pHXB2\_D in a pilot study focusing on coverage acquisition (as  
64 opposed to full-length sequencing), with the goal of evaluating the technology for future  
65 applications.

66

67

## 68 **Methods**

69 This work did not include human or animal subjects. Nanopore libraries for this work  
70 were prepared in their entirety by ARG in a Biosafety Level 2 laboratory on main campus at  
71 Baylor College of Medicine (BCM). Nanopore sequencing was completed between April and  
72 May of 2018 as two of several control experiments included in the Student Genomics pilot run  
73 **(Supplemental Information)**. Short-read sequencing was completed in April 2019.

### 74 **HIV-1 plasmids**

75 A plasmid, “pHXB2\_D” (alternate names pHXB2, pHXB-2D), believed to contain the  
76 HIV-1 reference strain HXB2 [17] was acquired from the NIH AIDS Reagent and Reference  
77 Program (ARP) via BioServe. pHXB2\_D was believed to be a molecular clone (likely a  
78 restriction product of HXB2 proviral DNA inserted into an unknown cloning plasmid backbone)  
79 from one of the earliest clinical “HXB2” HIV-1 isolates. At the time of this work, it was  
80 unknown whether this plasmid was ever sequence-verified before or after the reference sequence  
81 for HXB2 was deposited.

82 The provenance of pNL4-3\_gag-pol( $\Delta$ 1443-4553)\_EGFP, a reporter construct of pNL4-3  
83 with a gag-pol deletion between base 1443 and 4553 is known. HIV-1 NL4-3 (pNL4-3) was a  
84 fusion of NY5 and LAV/HXB2 plasmids [18] that to our knowledge are not readily available.  
85 pEVd1443 [19] was a deletion construct made from pNL4-3 used to make several HIV-1  
86 transgenic animals, including the FVB/N-Tg(HIV)26AIn/PkltJ (The Jackson Laboratory stock  
87 No: 022354) “Tg26” mouse. The deletion in pEVd1443 was made by SphI cutting between  
88 d1443 and 1444 with binding site 1443-1448, and cutting at a Ball site at 4551-4556 with blunt  
89 cutting between 4553 and 4554. The EGFP cassette includes additional sequence upstream and  
90 downstream of EGFP coding sequence. SphI and Ball may still be used to excise EGFP cassette.

91 A reporter construct was designed mimicking the pEVd1443 deletion: pNL4-3:  $\Delta$ G/P-EGFP  
92 [20]. Dr. Wei Zou rederived pNL4-3:  $\Delta$ G/P-EGFP at BCM [21]. Both constructs (plasmid and  
93 mouse) retained parts of gag and pol, with limited effects on protein-coding capacity, such as  
94 expression of p17 [22]. Based on Addgene naming conventions, we suggest pNL4-3\_gag-  
95 pol( $\Delta$ 1443-4553)\_EGFP to replace the previous name pNL4-3:  $\Delta$ G/P-EGFP for clarity.

96

### 97 **HIV-1 reference sequences**

98 The reference sequence of HXB2 is from the National Center for Biotechnology  
99 Information (NCBI), Genbank accession number K03455.1. It runs from the beginning of the 5'  
100 LTR to the end of the 3' LTR, and is 9,719 bp. This is similar to another HIV-1 reference that  
101 NCBI uses, AF033819.3. This is a 9,181 base HXB2-like sequence that starts at the 96 bp repeat  
102 in the 5'LTR, continues with the 5'UTR (U5), extends past the 3'UTR (U3) to the end of the 96  
103 bp repeat in 3'LTR, with one SNV at the *vpu* start codon aTg to aCg at position AF033819.3:560  
104 or K03455.1:6063. The reference sequence of NL4-3 is as a plasmid with accession number  
105 AF324493.1. It runs from the beginning of the 5' LTR to the end of the 3' LTR, spanning 9,709  
106 bp, and includes plasmid backbone with total length 14,825 bp.

107

### 108 **Long-read DNA sequencing**

109 A plasmid containing HXB2 was sequence-verified with long-read nanopore sequencing  
110 on a MinION Mk1B (Oxford Nanopore Technologies, Oxford, UK). Unless otherwise noted,  
111 reagents (and software) were purchased (or acquired) from Oxford Nanopore. Briefly, stock  
112 plasmid was diluted to 5 ng final amount in ultrapure water (as two samples) and processed with  
113 Rapid PCR Barcoding kit SQK-RPB004 along with 10 other barcoded samples (not discussed

114 further in this manuscript) following ONT protocol RPB\_9059\_V1\_REVA\_08MAR2018  
115 (**Figure 1C**), a public description of which is here: [https://store.nanoporetech.com/us/sample-](https://store.nanoporetech.com/us/sample-prep/rapid-pcr-barcoding-kit.html)  
116 [prep/rapid-pcr-barcoding-kit.html](https://store.nanoporetech.com/us/sample-prep/rapid-pcr-barcoding-kit.html). Two DNA polymerases were evaluated (barcode 10 used  
117 high-fidelity LA (for “long amplicon”) Taq (Takara); barcode 11 Taq (Sigma-Aldrich). Libraries  
118 were loaded onto a MinION flow cell version R9.4.1 and a 48-hour sequencing run was  
119 completed with MinKNOW (version 1.10.11). Residual reads from subsequent runs were pooled  
120 for final analyses. Long read data for pNL4-3\_gag-pol( $\Delta$ 1443-4553)\_EGFP was generated in  
121 other barcoded experiments (not shown).

122         Raw data was basecalled (converted from FAST5 to FASTQ format) with Albacore  
123 version 2.3.4 (older basecaller), Guppy version 2.3.1 (current official at time of work), and  
124 FlipFlop (Guppy development config). Mapping to reference was done with Minimap2 [23] and  
125 BWA-MEM [24], implemented in Galaxy (usegalaxy.org) [25]. Alignments (.bam and .bai files)  
126 were visualized in the Integrative Genomics Viewer [26] unless otherwise noted. For *de novo*  
127 assembly, demultiplexed basecalled reads were fed into Canu version 1.8 [27]. Genome size was  
128 estimated to be 16 Kb from agarose gel of undigested, but naturally degraded linearized  
129 pHXB2\_D (data not shown). SnapGene version 4.3.4 was used to manually annotate contigs  
130 from Canu. Blastn (NCBI) was used to identify unknown regions of pHXB2\_D. Polishing was  
131 performed on ONT-only assemblies with Medaka (<https://github.com/nanoporetech/medaka>), in  
132 Galaxy. Medaka models: r941\_min\_fast\_g303, r941\_min\_high\_g303, r941\_min\_high\_g330.  
133 Inference batch size (-b) = 100. The final pHXB2\_D assembly and other full-length HIV clones  
134 from the ARP were aligned to the most recent human reference genome (hg38) with Minimap2  
135 in Galaxy with the following parameters: Long assembly to reference mapping (-k19 -w19 -A1 -  
136 B19 -O39,81 -E3,1 -s200 -z200 --min-occ-floor=100).



137 **Statistics**

138 Two-tailed Mann-Whitney U tests were used to compare distributions in long-read data.  
139 P-values are reported over brackets delineating relevant comparisons. Calculations and graphing  
140 were done with GraphPad Prism for macOS version 8.0.2.

141 **Short-read DNA sequencing**

142 pHXB2\_D and control pNL4-3\_gag-pol( $\Delta$ 1443-4553)\_EGFP were provided as 35 ul at  
143 ~63 ng/ul to the Center for Computational & Integrative Biology DNA Core at Massachusetts  
144 General Hospital, an external DNA sequencing core specializing in high-throughput next  
145 generation (short-read) plasmid sequencing and assembly. Neither HXB2/pNL4-3 reference  
146 sequences nor pHXB2\_D/pNL4-3\_gag-pol( $\Delta$ 1443-4553)\_EGFP draft assemblies (from this  
147 work) were provided to core staff at the time of sequencing so that testing would remain masked.  
148 While the core's exact library prep is proprietary, multiplexed library prep and 150 single-end  
149 Illumina (ILMN) sequencing were most likely performed on a MiSeq with platform-specific  
150 reagents (V2 chemistry, per their website) and barcoding. Data was returned as FASTQ.  
151 FASTQC [28] was used in Galaxy for in-house data quality control, and read lengths were all  
152 142 bp per this tool. Mapping as above.

153 **Sequence comparisons**

154 We used MAFFT v7.475 [29], [30] to compare the LTR sequences of pHXB2\_D and  
155 HXB2, and pNL4-3 and pNL4-3\_gag-pol( $\Delta$ 1443-4553)\_EGFP. For cladistics, we used BLAST  
156 at HIV-DB ([https://www.hiv.lanl.gov/content/sequence/BASIC\\_BLAST/basic\\_blast.html](https://www.hiv.lanl.gov/content/sequence/BASIC_BLAST/basic_blast.html)) to  
157 find other HXB2-like genomes. The top 50 BLAST hits included many sequences pNL43 clones.  
158 pNL4-3 is an artificial recombinant of the NY5 clone with LAV and/or the HXB2 clone [18].  
159 The recombination point is marked by an EcoRI restriction site. We then made a multi-sequence

160 alignment with the final pHXB2\_D assembly, the top BAST hits, and the HIV-1 M group  
161 subtype reference set using GeneCutter  
162 ([https://www.hiv.lanl.gov/content/sequence/GENE\\_CUTTER/cutter.html](https://www.hiv.lanl.gov/content/sequence/GENE_CUTTER/cutter.html)), and built the  
163 maximum likelihood tree using IQ-tree  
164 (<https://www.hiv.lanl.gov/content/sequence/IQTREE/iqtree.html>). pNL4-3\_gag-pol( $\Delta$ 1443-  
165 4553)\_EGFP was not included in the above trees because of absence of divergence from pNL4-3  
166 sequences outside of the EGFP cassette.  
167

## 168 **Results**

169           Viewing mapped data in IGV, the long reads (median read length >2000 bp, **Figure 1E**)  
170 from both pHXB2\_D ONT experiments clearly covered each LTR (**Figure 1F, Supplemental**  
171 **Figures 1, 3**), while shorter reads collapsed into one of either LTR (**Figure 1F, Supplemental**  
172 **Figures 3D,3E**). This was also seen when long reads were shorter than LTRs (<600 bp).  
173 Mappers BWA-MEM and Minimap2 were chosen based on their ability to handle long and short  
174 reads. Other mappers were not evaluated. BWA-MEM mapped more ambiguously, piling  
175 partially mapped reads between each LTR; Minimap2 mapped with higher fidelity to reference  
176 without splitting reads. Coverage as sequencing depth was higher and more even from the  
177 higher-fidelity LA Taq library (**Supplemental Figure 1**). pNL4-3 was known to have distinct  
178 LTRs because it was a synthetic recombinant. The higher variant density in NL4-3 LTRs enabled  
179 mapping and phasing from short-read data only (**Supplemental Figure 2**).

180           We counted 20 single nucleotide variants (SNVs) in this reference clone of HXB2 (**Table**  
181 **1, Supplemental Table 3, Supplemental Figure 3E**). These mismatches were seen in all Canu  
182 assemblies (**Supplemental Figures 4A,4B**), verified in IGV and/or SnapGene, and were  
183 orthogonally verified by short-read sequencing performed by the external core given masked  
184 samples (**Supplemental Figure 3E**). These mismatches represent a ~0.21% divergence from  
185 reference HXB2 K03455.1 (20/9719), which was assumed to have perfect identity (0%  
186 divergence). Transitions were more common (14/20) (**Table 1**), coinciding with a previous  
187 report of increased transitions over transversions in infection models, because transversions are  
188 more likely to be deleterious to viral replication (i.e.: to cause protein-coding changes) [31].  
189 Indeed, almost half (9/20) of the observed SNVs occurred in protein-coding regions, even though  
190 92% of HXB2 is coding (791/9719). Of those 9 SNVs in protein-coding regions, 4 caused non-

191 synonymous mutations. One of those occurs in a region overlapping both gag and pol regions,  
192 however only pol exhibited a non-synonymous change from valine to isoleucine in p6, at  
193 position 2259 relative to HXB2. Other non-synonymous variants occurred at 4609 (in p31  
194 integrase, arginine to lysine), 7823 (in ASP antisense protein, glycine to arginine), and 9253 (in  
195 nef, isoleucine to valine). 11/20 SNVs were in LTRs (see **Supplemental Figure 3** for counting  
196 based on mapping); 8/20 of these would have been missed with mapping-only variant calling or  
197 consensus. The longest HIV-mapping read (**Figure 2**) phased 16/20 SNVs (failed at sites  
198 2,8,10,12, **Table 1**). pNL4-3\_gag-pol( $\Delta$ 1443-4553)\_EGFP did not have HIV-1 or plasmid  
199 backbone variants supported by long and short reads outside of the EGFP cassette.

200 We assembled the previously undefined plasmid pHXB2\_D (**Supplemental Figures**  
201 **4A,4B**). Canu's final output was a set of contiguous DNA sequences (contigs) as FASTA files. A  
202 consequence of assembling plasmid sequences with this tool was partial redundancy at contig  
203 ends (**Supplemental Figure 4C**). Manual end-trimming of contigs was performed in SnapGene  
204 based on an estimated length of 16 kilobases. Top blastn hits from barcode 10/LA Taq pHXB2  
205 basecalled with FlipFlop were as follows: for the main backbone (with origin of replication and  
206 antibiotic selection cassette for cloning), shuttle vector pTB101-CM DNA, complete sequence  
207 (based on pBR322), from 4352-8340; for the upstream element (relative to 5' LTR), Homo  
208 sapiens chromosome 3 clone RP11-83E7 map 3p, complete sequence from 58,052 to 59,165; for  
209 the downstream element, cloning vector pNHG-CapNM from 10,204 to 11,666. Other identified  
210 elements included Enterobacteria phage SP6 (the SP6 promoter, per SnapGene's "Detect  
211 common features"), complete sequence from 39,683 to 39,966. Identities of query to HXB2 and  
212 hits were all approximately 99%. The MGH CCIB DNA Core's proprietary *de novo* UltraCycler  
213 v1.0 assembler (Brian Seed and Huajun Wang, unpublished) was able to assemble both 5' and 3'

214 LTRs with short-read data only but may have collapsed SNVs into an artificial single consensus.  
215 Long-read mapping and assembly (and polished assemblies) orthogonally validated LTRs, and  
216 supported a single HIV-1 HXB2\_D haplotype (**Supplemental Figure 4,6**). A final LTR-phased  
217 and annotated assembly leveraging short and long reads is provided as pHXB2\_D  
218 Genbank:MW079479 (embargoed until publication). Importantly, for pHXB2\_D, each LTR was  
219 identical, which is distinct from the current HXB2 (K03455.1) (**Figure 3A**). Compared to pNL4-  
220 3\_gag-pol( $\Delta$ 1443-4553)\_EGFP (ACCESSION\_TBD), each LTR was distinct, but identical to  
221 pNL4-3's distinct 5' and 3' LTRs (AF324493.1) (**Figures 3B,6**).

222 To determine whether pHXB2\_D was an isolated provirus (as opposed to a cDNA clone),  
223 the pHXB2\_D assembly was aligned to the current human reference hg38, returning a single  
224 complete insertion site on 3p24.3 (**Figure 4A, Supplemental Table 2**). As expected, our pNL4-  
225 3\_gag-pol( $\Delta$ 1443-4553)\_EGFP had homology arms from two chromosomes (**Figures 4B,6,**  
226 **Supplemental Table 2**). We sought to put our pHXB2\_D assembly into context of other HXB2-  
227 like references available (**Figure 5**). pHXB2\_D (red) clusters closely with HXB2 reference  
228 (K03455) and related clone sequences (green). pNL4-3 clones in blue. The LTR-masked HIV-  
229 spanning segment of pHXB2\_D is most homologous to B.FR.1983.DM461230 and  
230 B.FR.1983.CS793683, which are identical except for areas in nef and a GFP insertion (verified  
231 by blastn). This finding suggests they were from the same stock. HIV-1 M group subtype  
232 reference set (HIV Sequence Database) was added to put HXB2s and pNL4-3 clones into  
233 perspective. HXB2 (believed to be a complete isolate) and NL4-3 (synthetic clone based on two  
234 early isolates [18]) are examples of HIV type 1 (HIV-1), group M, subgroup B.

235 As previously reported [32], per-read variability in ONT data was higher near  
236 homopolymers (runs of the same base) (**Supplemental Figure 5A**). For the datasets generated in

237 the present study, homopolymers were counted and classified as continuous (unbroken run of a  
238 given nucleobase) vs. discontinuous (broken run of a given nucleobase) (**Supplemental Figures**  
239 **5B,5D,5F,5H**). A/T (2 hydrogen bonds; 2H) and G/C (3 hydrogen bonds; 3H) were evaluated.  
240 Because runs longer than 4 or 5 were rare in these datasets, it was impossible to evaluate longer  
241 homopolymers. A simple calculation  $Abs(\Delta) = Abs(\#homopolymers_{reference} -$   
242  $\#homopolymers_{assembly})$  helped to evaluate the performance of basecallers, such that better  
243 basecallers had smaller  $Abs(\Delta)$  (**Supplemental Figures 5C,5E,5G,5I,5K**). At the level of  
244 consensus (made from sequences mapped to reference HXB2), homopolymers contributed few,  
245 if any, obvious errors. A special case of homopolymer, dimer runs, was noted to cause persistent  
246 errors regardless of ONT basecaller (**Supplemental Figures 5J,5K**). While dips occurred at  
247 certain points near homopolymers, the consensus did not change much at the sequencing depth  
248 used in this study for either barcoded pHXB2\_D samples (**Supplemental Figures 1,3,4**).  
249 Another interpretation is that homopolymers tend to seem truncated with ONT, with more reads  
250 in support of shorter homopolymers. Canu assemblies showed basecaller-dependent variability  
251 (**Supplemental Table 3**). That said, newer basecallers tended to produce fewer and smaller per-  
252 read truncations. Assemblies without polishing did not correct all homopolymer truncations  
253 (**Supplemental Figure 4A**). Polishing assemblies tended to correct these toward the final  
254 pHXB2\_D assembly (**Supplemental Figures 4B,6**). Data from polished ONT-only assemblies  
255 and short-read sequencing do not support the truncations (gaps relative to reference) suggested  
256 by unpolished ONT-only assemblies, representing a known current limitation of ONT. These are  
257 not the same as the 20 SNVs supported by BOTH long- and short-read sequencing performed in  
258 this study. The ratio of per-read deletions to per-read insertions (DEL/INS) was much higher for  
259 SNVs occurring at homopolymers and near the same base, and this difference was maintained

260 between all basecallers used (**Supplemental Figure 5L**). These changes created more  
261 problematic (longer) homopolymers.

262

263

## 264 **Discussion**

265           This work represents the first instance of complete and unambiguous sequencing of HIV-  
266 1 provirus as plasmid and contributed to the identification of single nucleotide variants which  
267 may not have been easily determined using other sequencing modalities, illustrating the  
268 importance of validating molecular reagents in their entirety, and with complementary  
269 approaches. Nanopore sequencing surpassed the read length limitations of traditional sequencing  
270 modalities used for HIV such as Sanger sequencing and sequencing-by-synthesis by at least two  
271 orders of magnitude. Other long-read DNA sequencing technologies such as PacBio's zero-mode  
272 waveguide DNA sequencing were not evaluated in this work, but in principle would be  
273 interchangeable for nanopore sequencing. Paired-end sequencing (as either DNA-seq or RNA-  
274 seq) was not evaluated in this work, but has shown promise phasing LTRs in our hands [33]–  
275 [35].

### 276 **First complete pass over all HIV information in reference plasmid pHXB2\_D**

277           HIV provirus is believed to occur naturally as one or a few copies of reverse-transcribed  
278 DNA forms integrated into the host nuclear genome. Depending on where integration occurs,  
279 local GC or AT content might cause problems for detecting integrants with PCR. HIV also has  
280 conserved transitions from areas of higher GC content (~60%) to content approximating average  
281 human GC content (~40%). To limit PCR sequencing bias and to accommodate for the potential  
282 heterogeneity of HIV sequences, we fractionated whole sample directly (as opposed to PCR-  
283 barcoding select amplicons) with tagmentation provided in the Rapid PCR-Barcoding kit (ONT).  
284 Tagmentation in this workd used transposon-mediated cleavage and ligation of barcode adapters  
285 for later PCR amplification. A consequence of this fractionation was a distribution of reads  
286 (**Figure 1E**) shorter than longer reads reported elsewhere for ONT experiments [36]. Based on



287 this distribution and the level of coverage, it was expected that HIV might be covered from end  
288 to end, but this would have been exceptional. That said, an example is presented here (**Figure 2**).  
289 The provirus status of pHXB2\_D is supported by recovery of both upstream and downstream  
290 homology arms which map to a single human integration site.

### 291 **Long reads enable LTR phasing and HIV haplotype definition**

292 We created 6 assemblies for pHXB2\_D from ONT-only data (**Supplemental Figure 4**),  
293 each with a common set of 20 SNVs (11 in LTRs), and final assemblies (a single HIV-1  
294 HXB2\_D haplotype; a single HIV-1 NL4-3\_gag-pol( $\Delta$ 1443-4553)\_EGFP haplotype) leveraging  
295 long- and short-read data. The external core's *de novo* assembly pipeline identified the same 20  
296 SNVs, and variants in the LTRs were supported by ONT unambiguously. That the core's  
297 assembler was able to phase LTR variants in these samples may have been because the samples  
298 had high amounts of the same upstream and downstream sequences because of coming from one  
299 plasmid. The core's assembler thus may have had additional sequencing information at the edges  
300 of HXB2, helping it to map deeper into each LTR. This approach would likely fail in samples  
301 with multiple integrations (as in various animal models of HIV disease [37]), which have  
302 unknown upstream and downstream sequences, or in samples from natural human infection,  
303 which is well known to exhibit multiple pseudo-random integration sites between cells [38],  
304 [39], but with mostly single integration events per cell [8]. Inverse PCR (iPCR) is an alternative  
305 method [40] with its own issues (e.g., PCR biases, HIV concatemers, host repeats). While current  
306 PCR reagents have extended the range of what can be seen with iPCR, current approaches are  
307 likewise limited by long DNA extraction methods, sample amount, and remain to be optimized.  
308 If coverage is sufficient ( $\geq 10$  reads in non-homopolymers and non-dimer runs), long-read  
309 sequencing can provide linked variant information to individual integration sites. Identical 5' and

310 ‘3 LTRs (**Figure 3**) in the context of a single integration event (**Figure 4A**) support this integrant  
311 being a *bona fide* provirus [41]. Other proviruses also had identical LTR pairs (**Supplemental**  
312 **Table 2**). Technical limitations such as PCR errors before earlier sequencing may explain the  
313 variability in the HXB2 reference LTRs. These were sequenced at a time before paired-end 150  
314 or long-read DNA-seq were available to phase LTRs, raising the possibility that these LTRs  
315 were incorrectly annotated by depositors assuming identity and copy-and-pasting the sequence of  
316 one LTR for both without being able to unambiguously resolve each LTR.

### 317 **Mutations in a reference HIV-1 plasmid illustrate the need for reagent verification**

318 Up until 2020, HIV had been the most studied human pathogen, but HIV reagents are not  
319 routinely re(verified). The pHXB2\_D sequenced was allegedly a reference plasmid, with  
320 unknown divergence between the published reference HXB2. Three independent experiments  
321 (two long-read with PCR-barcoded libraries made with regular and long-amplicon Taq master  
322 mixes, one short-read) yielded at least 20 single nucleotide variants in pHXB2\_D which differed  
323 from the HXB2 reference sequence (**Table 1, Supplemental Figure 3**), which were also  
324 concordant across the three basecallers used (**Supplemental Table 3**) and are therefore not PCR  
325 errors. By leveraging long reads with the MinION, we were able to find mutations in highly  
326 repetitive LTRs relative to HXB2 Genbank:K03455.1 which are often assumed (but until now  
327 never proven) to be identical (**Table 1, Figure 1, Supplemental Figures 1, 3E**), as well as  
328 mutations in protein-coding regions (**Table 1**). We were also able to confirm that the backbone  
329 of this plasmid is from pSP62 [17], a pBR322 derivative with the SP6 promoter [42], aiding in  
330 the continued use of this important reagent, and illustrating the need of full-length reagent  
331 validation moving forward. We suggest that all clinical reagents (e.g., vectors) be sequence-

332 verified at the level of single-molecule sequencing as standard quality control to protect against  
333 sample heterogeneity.

### 334 **Improvement in ONT basecallers over time**

335 Albacore, Guppy, and FlipFlop basecallers were compared. Each produced reads of  
336 similar length distributions (relative to polymerase used), while Guppy and FlipFlop produced  
337 improved and best performance relative to quality score distributions (**Figure 1D**). Interestingly,  
338 while read length distributions were affected by fidelity of polymerases evaluated in this work,  
339 mean quality distributions were not. This is important because of the differences in cost between  
340 higher fidelity Taq and classic Taq enzymes. That said, higher fidelity LA Taq produced much  
341 higher coverage compared to Taq (**Supplemental Figure 1**). In consideration of library prep,  
342 choice of enzyme used should be based on the desired read-length distribution and coverage.  
343 Regarding read mapping, the increase in mean quality score between these basecallers improved  
344 overall mapping, in part by facilitating demultiplexing, resulting in approximately ~10%  
345 increases number of reads in barcoded libraries before mapping (shift in reads from unclassified  
346 to a given barcode). FlipFlop tended to handle homopolymers better than previous basecallers  
347 (**Supplemental Figures 5,6**). Homopolymers in HXB2 tended to exhibit apparent deletions near  
348 5' ends of homopolymers (upstream due to technical artifact from mapping), but because  
349 consensus is conserved (example, at least 80% of base in called read set is identical to reference),  
350 and because short-read data lacks INDELS at these sites, it is unlikely that any of these  
351 homopolymer deletions are real in these experiments. Dimer runs – stretches of repeating 2-mers  
352 (pronounced “two-mers”) – proved challenging regardless of basecaller. Mapping as above may  
353 be used to aid in manually calling these when they occur. Albacore is currently deprecated, and  
354 current versions of Guppy now incorporate a version of FlipFlop called Guppy High-ACcuracy

355 (HAC). Guppy HAC and subsequence versions were not evaluated in this work. Polishing is  
356 becoming standard practice for processing assemblies from ONT data because it redresses most  
357 homopolymer errors propagated into long-read-only assemblies. The best manually finished and  
358 polished contig had 1 error out of 16,722 bases, illustrating the utility of ONT hardware when  
359 paired with burgeoning software.  
360

## 361 **Conclusions**

362 HIV informatics, the study of HIV sequence information, has been limited by the  
363 common assumption that sequence fidelity exists between reference genomes available in  
364 sequence databases and similarly named HIV clones. Modern DNA sequencing methods, such as  
365 long- and short-read sequencing, are available to redress this issue. Long-read sequencing fills in  
366 gaps left behind by short-read interrogation of HIV-1. Current limitations of the approaches used  
367 in the present work to study HIV are 1.) the cost of long-read sequencing, regardless of platform,  
368 compared to the cheaper short reads from sequencing-by-synthesis, 2.) long DNA extraction  
369 methods in diseased tissue (Gener, unpublished), and 3.) the lower per-base accuracy (low-mid  
370 90's with ONT vs. 98-99% with ILMN or newer PacBio HiFi), including difficulty near  
371 homopolymers and dimer runs (**Supplemental Figure 5**). A nontrivial but redressable limitation  
372 is availability of personnel trained to prepare sequencing libraries, to run sequencing, and to  
373 analyze results. As the price of long-read sequencing decreases, hardware and software used in  
374 basecalling and library protocols improve, and with the advent of more user-friendly tools, the  
375 cost of obtaining usable data from long reads will become negligible compared to the ability to  
376 answer historically intractable questions. This work raises the possibility of being able to detect  
377 at least some recombination events, in a reference-free manner requiring only the comparison of  
378 LTRs from the same integrants (**Figure 6**). We suggest that pHXB2\_D and pNL4-3 constructs  
379 may be used as negative and positive controls for the development of such screens. While other  
380 HIV reference proviral clones were reported to have identical LTR pairs, this remains to be  
381 tested in other clones, since other clones were generated with shorter sequencing methods. For  
382 example, pNL4-3\_gag-pol( $\Delta$ 1443-4553)\_EGFP had distinct LTRs as a plasmid. However, if an  
383 NL4-3 virus is made from pNL4-3, the LTR sequences would homogenize to pNL4-3's 3' LTR

384 sequence. Future work will include optimizing DNA extraction protocols with the goal of  
385 capturing higher-coverage fuller glimpses of each HIV proviral integration site in *in vivo* HIV  
386 models and patient samples. This work has broad implications for all cells infected by both  
387 integrating and non-integrating viruses, and for the characterization of targeted regions in the  
388 genome which may be recalcitrant to previous sequencing methods. Long-read sequencing is an  
389 important emerging tool defining the post-scaffold genomic era, allowing for the characterization  
390 of anatomical landmarks of hosts and pathogens at the genomic scale.

391 **Disclaimer**

392 Erratum: Preprint version 1 of this work [43] incorrectly cited the Integrated Genome  
393 Browser for work that was completed with the Integrative Genomics Viewer. Apologies for the  
394 mistake.

395 **Funding**

396 This work was funded in part by institutional support from Baylor College of Medicine;  
397 the Human Genome Sequencing Center at Baylor College of Medicine; private funding by Bob  
398 Ostendorf, CEO of East Coast Oils, Inc., Jacksonville, Florida; ARG's own private funding,  
399 including Student Genomics (manuscripts in prep). Compute resources from the Computational  
400 and Integrative Biomedical Research Center at BCM ("sphere" cluster managed by Dr. Steven  
401 Ludtke) and the Department of Molecular and Human Genetics at BCM ("taco" cluster managed  
402 by Mr. Tanner Beck and Dr. Charles Lin) greatly facilitated the completion of this work. ARG  
403 has also received the PFLAG of Jacksonville scholarship for multiple years.

404 **Competing interests**

405 ARG received travel bursaries from Oxford Nanopore Technologies (ONT). The present  
406 work was completed independently of ONT. Other authors declare no conflicts of interest.

407 **Authors' contributions**

408 ARG conceived of this project, performed experiments, analyzed results, and drafted the  
409 manuscript. WZ rederived pNL4-3\_gag-pol( $\Delta$ 1443-4553)\_EGFP. All authors discussed data and  
410 edited the manuscript. ARG and PK provided funding.

411 **Acknowledgements**

412 As part of a summer bioinformatics internship in the Paul E. Klotman Laboratory at  
413 Baylor College of Medicine, Akash Naik supervised by ARG performed *in silico* mapping

414 analyses/experiments, generated and/or aided in the synthesis of **Supplemental Figure 4**, and  
415 assisted in writing relevant portions, discussing, and editing this manuscript. During a second  
416 summer internship with American Physician Scientists Association Virtual Summer Research  
417 Program, the following students were supervised by ARG helped to create **Figure 1A** and  
418 **Supplemental Table 1**: Yini Liang, Kirk Niekamp, Maliha Jeba, Delmarie M. Rivera  
419 Rodríguez. Orthogonal sequence verification was performed as a service by staff at the Center  
420 for Computational & Integrative Biology DNA Core at Massachusetts General Hospital, Boston,  
421 MA, USA.

422 We would like to thank the staff at the DNA Core for their exceptional services,  
423 including expert analyses and rapid turnaround time. We would like to thank Drs. Steven  
424 Richards, Qingchang Meng and the staff of the Human Genome Sequencing Center Research  
425 (HGSC) and Development (R&D) team for their earlier support in nanopore adoption. We would  
426 like to thank the team at Oxford Nanopore Technologies for their timely improvements and  
427 continued R&D. I would also like to thank Ms. Taneasha Monique Washington (current) and  
428 former members of the Paul E. Klotman lab, Dr. Gokul C. Das and Alexander Batista. I would  
429 like to thank Dr. Alana Canupp and the late Dr. Jim Maruniak for their early interest in my  
430 scientific development, and for the passion that they show in everything that they do.

431 **Available additional files**

432 Albacore basecalled barcode 10

433 Guppy basecalled barcode 10

434 FlipFlop basecalled barcode 10

435 Albacore basecalled barcode 11

436 Guppy basecalled barcode 11



437 FlipFlop basecalled barcode 11

438 Minimap2 and BWA-MEM alignments (.bam and .bai)

439 Clipboards from points of interest (verified SNVs; n=20)

440 .dna files of contigs (n=6)

441 MGH data (raw + contig)

442 Supplemental Tables

443 Supplemental Figures

444

445

446

## 447 **References**

- 448 [1] F. Barré-Sinoussi *et al.*, “Isolation of a T-lymphotropic retrovirus from a patient at risk for  
449 acquired immune deficiency syndrome (AIDS).,” *Science*, vol. 220, no. 4599, pp. 868–  
450 871, May 1983, doi: 10.1126/science.6189183.
- 451 [2] S. Wain-Hobson *et al.*, “LAV revisited: origins of the early HIV-1 isolates from Institut  
452 Pasteur.,” *Science*, vol. 252, no. 5008, pp. 961–965, May 1991, doi:  
453 10.1126/science.2035026.
- 454 [3] L. Ratner *et al.*, “Complete nucleotide sequence of the AIDS virus, HTLV-III.,” *Nature*,  
455 vol. 313, no. 6000, pp. 277–284, Jan. 1985, doi: 10.1038/313277a0.
- 456 [4] A. R. Gener and J. T. Kimata, “Full-coverage native RNA sequencing of HIV-1 viruses,”  
457 *bioRxiv*, p. 845610, Jan. 2019, doi: 10.1101/845610.
- 458 [5] G. M. Shaw, B. H. Hahn, S. K. Arya, J. E. Groopman, R. C. Gallo, and F. Wong-Staal,  
459 “Molecular characterization of human T-cell leukemia (lymphotropic) virus type III in the  
460 acquired immune deficiency syndrome.,” *Science*, vol. 226, no. 4679, pp. 1165–1171,  
461 Dec. 1984, doi: 10.1126/science.6095449.
- 462 [6] M. Krupovic *et al.*, “Ortervirales: New Virus Order Unifying Five Families of Reverse-  
463 Transcribing Viruses,” *J. Virol.*, vol. 92, no. 12, pp. e00515-18, May 2018, doi:  
464 10.1128/JVI.00515-18.
- 465 [7] E. H. Graf *et al.*, “Elite suppressors harbor low levels of integrated HIV DNA and high  
466 levels of 2-LTR circular HIV DNA compared to HIV+ patients on and off HAART,”  
467 *PLoS Pathog.*, vol. 7, no. 2, 2011, doi: 10.1371/journal.ppat.1001300.
- 468 [8] Y. Ito *et al.*, “Number of infection events per cell during HIV-1 cell-free infection,” *Sci.*  
469 *Rep.*, vol. 7, no. 1, p. 6559, 2017, doi: 10.1038/s41598-017-03954-9.

- 470 [9] I. Cuesta, A. Mari, A. Ocampo, C. Miralles, S. Pérez-castro, and M. M. Thomson,  
471 “Sequence Analysis of In Vivo -Expressed HIV-1 Spliced RNAs Reveals the Usage of  
472 New and Unusual Splice Sites by Viruses of Different Subtypes,” pp. 1–24, 2016, doi:  
473 10.1371/journal.pone.0158525.
- 474 [10] C. Wymant *et al.*, “Easy and accurate reconstruction of whole HIV genomes from short-  
475 read sequence data with shiver,” *Virus Evol.*, vol. 4, no. 1, pp. 1–13, 2018, doi:  
476 10.1093/ve/vey007.
- 477 [11] K. M. Bruner *et al.*, “A quantitative approach for measuring the reservoir of latent HIV-1  
478 proviruses,” *Nature*, vol. 566, no. 7742, pp. 120–125, 2019, doi: 10.1038/s41586-019-  
479 0898-8.
- 480 [12] M. R. Pinzone and U. O’Doherty, “Measuring integrated HIV DNA ex vivo and in vitro  
481 provides insights about how reservoirs are formed and maintained,” *Retrovirology*, vol.  
482 15, no. 1, pp. 1–12, 2018, doi: 10.1186/s12977-018-0396-3.
- 483 [13] K. B. Einkauf *et al.*, “Intact HIV-1 proviruses accumulate at distinct chromosomal  
484 positions during prolonged antiretroviral therapy Find the latest version : Intact HIV-1  
485 proviruses accumulate at distinct chromosomal positions during prolonged antiretroviral  
486 therapy,” vol. 129, no. 3, pp. 988–998, 2019.
- 487 [14] D. Bonsall *et al.*, “THAA0101 - HIV genotyping and phylogenetics in the HPTN 071  
488 (PopART) study: Validation of a high-throughput sequencing assay for viral load  
489 quantification, genotyping, resistance testing and high-resolution transmission  
490 networking,” in *22nd International AIDS Conference (AIDS2018)*, 2018, p. Oral Abstract.
- 491 [15] A. N. Banin *et al.*, “Development of a Versatile, Near Full Genome Amplification and  
492 Sequencing Approach for a Broad Variety of HIV-1 Group M Variants,” *Viruses*, vol. 11,

- 493 no. 4, p. 317, Apr. 2019, doi: 10.3390/v11040317.
- 494 [16] N. Nguyen Quang *et al.*, “Dynamic nanopore long-read sequencing analysis of HIV-1  
495 splicing events during the early steps of infection,” *Retrovirology*, vol. 17, no. 1, p. 25,  
496 2020, doi: 10.1186/s12977-020-00533-1.
- 497 [17] A. G. Fisher, E. Collalti, L. Ratner, R. C. Gallo, and F. Wong-Staal, “A molecular clone of  
498 HTLV-III with biological activity,” *Nature*, vol. 316, no. 6025, pp. 262–265, 1985, doi:  
499 10.1038/316262a0.
- 500 [18] A. Adachi *et al.*, “Production of acquired immunodeficiency syndrome-associated  
501 retrovirus in human and nonhuman cells transfected with an infectious molecular clone.,”  
502 *J. Virol.*, vol. 59, no. 2, pp. 284–91, 1986.
- 503 [19] P. Dickie *et al.*, “HIV-associated nephropathy in transgenic mice expressing HIV-1  
504 genes,” *Virology*, 1991. [Online]. Available: [http://ac.els-cdn.com/0042682291907595/1-](http://ac.els-cdn.com/0042682291907595/1-s2.0-0042682291907595-main.pdf?_tid=8f811f10-d10c-11e5-82e8-00000aacb35e&acdnat=1455228938_33d4226549c6410971ced1c4c3573a44)  
505 [s2.0-0042682291907595-main.pdf?\\_tid=8f811f10-d10c-11e5-82e8-](http://ac.els-cdn.com/0042682291907595/1-s2.0-0042682291907595-main.pdf?_tid=8f811f10-d10c-11e5-82e8-00000aacb35e&acdnat=1455228938_33d4226549c6410971ced1c4c3573a44)  
506 [00000aacb35e&acdnat=1455228938\\_33d4226549c6410971ced1c4c3573a44](http://ac.els-cdn.com/0042682291907595/1-s2.0-0042682291907595-main.pdf?_tid=8f811f10-d10c-11e5-82e8-00000aacb35e&acdnat=1455228938_33d4226549c6410971ced1c4c3573a44). [Accessed:  
507 11-Feb-2016].
- 508 [20] M. Husain, “HIV-1 Nef Induces Proliferation and Anchorage-Independent Growth in  
509 Podocytes,” *J. Am. Soc. Nephrol.*, vol. 13, no. 7, pp. 1806–1815, 2002, doi:  
510 10.1097/01.ASN.0000019642.55998.69.
- 511 [21] H. Li *et al.*, “Epigenetic regulation of RCAN1 expression in kidney disease and its role in  
512 podocyte injury,” *Kidney Int.*, vol. 94, no. 6, pp. 1160–1176, 2018, doi:  
513 10.1016/j.kint.2018.07.023.
- 514 [22] S. Curreli *et al.*, “B cell lymphoma in HIV transgenic mice.,” *Retrovirology*, vol. 10, p.  
515 92, Jan. 2013, doi: 10.1186/1742-4690-10-92.

- 516 [23] H. Li, “Minimap2: pairwise alignment for nucleotide sequences,” *Bioinformatics*, vol. 34,  
517 no. 18, pp. 3094–3100, May 2018, doi: 10.1093/bioinformatics/bty191.
- 518 [24] H. Li and R. Durbin, “Fast and accurate long-read alignment with Burrows – Wheeler  
519 transform,” vol. 26, no. 5, pp. 589–595, 2010, doi: 10.1093/bioinformatics/btp698.
- 520 [25] E. Afgan *et al.*, “The Galaxy platform for accessible, reproducible and collaborative  
521 biomedical analyses: 2016 update,” *Nucleic Acids Res.*, vol. 44, no. W1, pp. W3–W10,  
522 2016, doi: 10.1093/nar/gkw343.
- 523 [26] J. T. Robinson *et al.*, “Integrative genomics viewer,” *Nat Biotechnol*, vol. 29, no. 1, pp.  
524 24–26, 2011, doi: 10.1038/nbt0111-24.
- 525 [27] B. P. Walenz, S. Koren, N. H. Bergman, A. M. Phillippy, J. R. Miller, and K. Berlin,  
526 “Canu: scalable and accurate long-read assembly via adaptive k -mer weighting and repeat  
527 separation,” *Genome Res.*, vol. 27, no. 5, pp. 722–736, 2017, doi: 10.1101/gr.215087.116.
- 528 [28] S. Andrews, “FastQC A Quality Control tool for High Throughput Sequence Data.”
- 529 [29] K. Katoh and D. M. Standley, “MAFFT multiple sequence alignment software version 7:  
530 Improvements in performance and usability,” *Mol. Biol. Evol.*, vol. 30, no. 4, pp. 772–780,  
531 2013, doi: 10.1093/molbev/mst010.
- 532 [30] K. Katoh, J. Rozewicki, and K. D. Yamada, “MAFFT online service: multiple sequence  
533 alignment, interactive sequence choice and visualization,” *Brief. Bioinform.*, vol. 20, no. 4,  
534 pp. 1160–1166, Sep. 2017, doi: 10.1093/bib/bbx108.
- 535 [31] D. M. Lyons and A. S. Lauring, “Evidence for the Selective Basis of Transition-to-  
536 Transversion Substitution Bias in Two RNA Viruses,” *Mol. Biol. Evol.*, vol. 34, no. 12,  
537 pp. 3205–3215, 2017, doi: 10.1093/molbev/msx251.
- 538 [32] N. J. Loman, J. Quick, and J. T. Simpson, “A complete bacterial genome assembled de

- 539 novo using only nanopore sequencing data,” *Nat. Methods*, vol. 12, no. 8, pp. 733–735,  
540 2015, doi: 10.1038/nmeth.3444.
- 541 [33] A. Gener *et al.*, “PEA0011 - Insights from HIV-1 transgene insertions in the murine  
542 model of HIV-associated nephropathy,” in *23rd International AIDS Conference*  
543 (*AIDS2020*), 2020, vol. ePoster.
- 544 [34] A. R. Gener *et al.*, “P39 - Insights from comprehensive transcript models of HIV-1,” in  
545 *Genome Informatics 2020*, 2020, p. ePoster.
- 546 [35] A. R. Gener, T. Washington, D. Hyink, and P. Klotman, “3264 - The Multiple HIV-1  
547 Transgenes in the Murine Model of HIV-Associated Nephropathy Fail to Segregate as  
548 Expected,” in *American Society of Human Genetics Annual Meeting*, 2020, p. ePoster.
- 549 [36] A. Payne, N. Holmes, V. Rakyan, and M. Loose, “Whale watching with BulkVis: A  
550 graphical viewer for Oxford Nanopore bulk fast5 files,” *bioRxiv*, p. 312256, Jan. 2018,  
551 doi: 10.1101/312256.
- 552 [37] P. Rosenstiel, A. Gharavi, V. D’Agati, and P. Klotman, “Transgenic and infectious animal  
553 models of HIV-associated nephropathy,” *J. Am. Soc. Nephrol.*, vol. 20, no. 11, pp. 2296–  
554 304, 2009, doi: 10.1681/ASN.2008121230.
- 555 [38] M. Kvaratskhelia, A. Sharma, R. C. Larue, E. Serrao, and A. Engelman, “Molecular  
556 mechanisms of retroviral integration site selection,” *Nucleic Acids Res.*, vol. 42, no. 16,  
557 pp. gku769-, 2014, doi: 10.1093/nar/gku769.
- 558 [39] B. Marini *et al.*, “Nuclear architecture dictates HIV-1 integration site selection,” *Nature*,  
559 vol. 521, pp. 227–233, 2015, doi: 10.1038/nature14226.
- 560 [40] H. Ochman, A. S. Gerber, and D. L. Hartl, “Genetic applications of an inverse polymerase  
561 chain reaction,” *Genetics*, vol. 120, no. 3, pp. 621–623, 1988.

- 562 [41] W.-S. Hu and S. H. Hughes, “HIV-1 Reverse Transcription,” *Cold Spring Harb. Perspect.*  
563 *Med.* , vol. 2, no. 10, Oct. 2012, doi: 10.1101/cshperspect.a006882.
- 564 [42] M. R. Green, T. Maniatis, and D. A. Melton, “Human beta-globin pre-mRNA synthesized  
565 in vitro is accurately spliced in *Xenopus* oocyte nuclei.,” *Cell*, vol. 32, no. 3, pp. 681–  
566 694, Mar. 1983, doi: 10.1016/0092-8674(83)90054-5.
- 567 [43] A. R. Gener, “Full-coverage sequencing of HIV-1 provirus from a reference plasmid,”  
568 *bioRxiv*, p. 611848, Jan. 2019, doi: 10.1101/611848.
- 569 [44] B. Lucic *et al.*, “Spatially clustered loci with multiple enhancers are frequent targets of  
570 HIV-1,” *bioRxiv*, 2018.
- 571 [45] W. J. Kent *et al.*, “The Human Genome Browser at UCSC,” *Genome Res.* , vol. 12, no. 6,  
572 pp. 996–1006, Jun. 2002, doi: 10.1101/gr.229102.
- 573 [46] Y. Peng, H. C. M. Leung, S. M. Yiu, and F. Y. L. Chin, “IDBA – A Practical Iterative de  
574 Bruijn Graph De Novo Assembler BT - Research in Computational Molecular Biology,”  
575 2010, pp. 426–440.
- 576 [47] P. J. A. Cock, B. A. Grünig, K. Paszkiewicz, and L. Pritchard, “Galaxy tools and  
577 workflows for sequence analysis with applications in molecular plant pathology,” *PeerJ*,  
578 vol. 1, p. e167, 2013, doi: 10.7717/peerj.167.
- 579 [48] C. B, W. T, and S. S, “Genome sequence assembly using trace signals and additional  
580 sequence information.,” *Comput. Sci. Biol. Proc. Ger. Conf. Bioinforma.*, vol. 99, pp. 45–  
581 56.
- 582 [49] A. Bankevich *et al.*, “SPAdes: A New Genome Assembly Algorithm and Its Applications  
583 to Single-Cell Sequencing,” *J. Comput. Biol.*, vol. 19, no. 5, pp. 455–477, Apr. 2012, doi:  
584 10.1089/cmb.2012.0021.

- 585 [50] G. Cuccuru *et al.*, “Orione, a web-based framework for NGS analysis in microbiology,”  
586 *Bioinformatics*, vol. 30, no. 13, pp. 1928–1929, Jul. 2014, doi:  
587 10.1093/bioinformatics/btu135.
- 588 [51] R. L. Warren, G. G. Sutton, S. J. M. Jones, and R. A. Holt, “Assembling millions of short  
589 DNA sequences using SSAKE,” *Bioinformatics*, vol. 23, no. 4, pp. 500–501, Feb. 2007,  
590 doi: 10.1093/bioinformatics/btl629.
- 591
- 592



593 **Tables**

594

595 **Table 1: Summary of pHXB2 sample divergence from reference HXB2.**

| Site | Position | Change                     | Substitution |                            | Mutation Class<br>(Syn/Non/Stop) | Homopolymer-adjacent? | Same as neighbor? | LANL Feature | Subfeature    | Frame                         |
|------|----------|----------------------------|--------------|----------------------------|----------------------------------|-----------------------|-------------------|--------------|---------------|-------------------------------|
|      |          |                            | Class        | Change                     |                                  |                       |                   |              |               |                               |
| 1    | 24       | C>A                        | transversion | NA                         | NA                               | yes                   | yes               | 5'LTR        | U3            | NA                            |
| 2    | 108      | A>G                        | transition   | NA                         | NA                               | yes                   | yes               | 5'LTR        | U3            | NA                            |
| 3    | 164      | G>T                        | transversion | NA                         | NA                               | yes                   | no                | 5'LTR        | U3            | NA                            |
| 4    | 168      | T>G                        | transversion | NA                         | NA                               | yes                   | yes               | 5'LTR        | U3            | NA                            |
| 5    | 176      | A>G                        | transition   | NA                         | NA                               | yes                   | yes               | 5'LTR        | U3            | NA                            |
| 6    | 182      | C>T                        | transition   | NA                         | NA                               | yes                   | no                | 5'LTR        | U3            | NA                            |
| 7    | 227      | A>G                        | transition   | NA                         | NA                               | yes                   | yes               | 5'LTR        | U3            | NA                            |
| 8    | 291      | A>G                        | transition   | NA                         | NA                               | no                    | no                | 5'LTR        | U3            | NA                            |
| 9    | 333      | C>T                        | transition   | NA                         | NA                               | no                    | no                | 5'LTR        | U3            | NA                            |
| 10   | 654      | C>T                        | transition   | NA                         | NA                               | no                    | no                | None         | None          | NA                            |
| 11   | 1659     | aaG>aaA                    | transition   | None                       | Syn                              | yes                   | yes               | gag          | p24, p55      | gag frame<br>1                |
| 12   | 2259     | gag:agG>agA<br>pol:Gtc>Atc | transition   | gag:Arg>Arg<br>pol:Val>Ile | Syn/Non                          | no                    | no                | gagpol       | p6            | gag frame<br>1 pol<br>frame 3 |
| 13   | 2927     | aaG>aaA                    | transition   | None                       | Syn                              | yes                   | yes               | pol          | p51 RT        | pol frame<br>3                |
| 14   | 3812     | ccC>ccT                    | transition   | None                       | Syn                              | yes                   | yes               | pol          | p51 RT        | pol frame<br>3                |
| 15   | 4574     | acT>acA                    | transversion | None                       | Syn                              | no                    | no                | pol          | p31 IN        | pol frame<br>3                |
| 16   | 4596     | Ggt>Agt                    | transition   | None                       | Syn                              | yes                   | no                | pol          | p31 IN        | pol frame<br>3                |
| 17   | 4609     | aGg>aAg                    | transition   | Arg>Lys                    | Non                              | yes                   | yes               | pol          | p31 IN        | pol frame<br>3                |
| 18   | 7823     | gcC>gcG<br>Ggc>Cgc         | transversion | ASP:Gly>Arg                | Syn/Non                          | no                    | no                | gp41         | RRE, also ASP | gp41<br>frame 3,<br>ASP -2    |
| 19   | 9253     | Ata>Gta                    | transition   | Ile>val                    | Non                              | no                    | yes               | nef/3'LTR    | also U3       | nef frame<br>1                |
| 20   | 9418     | C>T                        | transition   | NA                         | NA                               | no                    | no                | 3'LTR        | U3            | NA                            |

596 Coverage numbers vary by input (albacore, guppy, FlipFlop basecalled FASTQ) and mapping  
597 method (Minimap2 vs. BWA-MEM). This information is provided as Supplemental Digital

598 Content. Base-1 (first base is numbered 1, 2<sup>nd</sup> 2, etc.), relative to HXB2, Genbank:K03455.1.  
599 Changed base represented as upper-case. Annotated as codon if in protein-coding region. No  
600 deletions or insertions were predicted from manual inspection or supported by short-read  
601 sequencing. Abbreviations, ASP: antisense protein, RRE: rev-response element, NA: not  
602 applicable. Syn: synonymous mutation. Non: non-synonymous mutation. Stop: stop codon/non-  
603 sense mutation. LTR: long terminal repeat. RT: reverse transcriptase. IN: integrase. LANL: Los  
604 Alamos National Laboratory HIV Sequence Database. Data from three separate sequencing  
605 experiments on the same plasmid sample support these 20 sites. Note site 1-8 variants in 5'LTR  
606 have been previously reported (LANL), albethey ambiguously. These may also be incorrectly  
607 annotated as variants in nef.

608 **Figures**

609

610

611 **Figure 1: HIV information in pHXB2\_D is recovered by long-read sequencing and**  
 612 **mapping.**

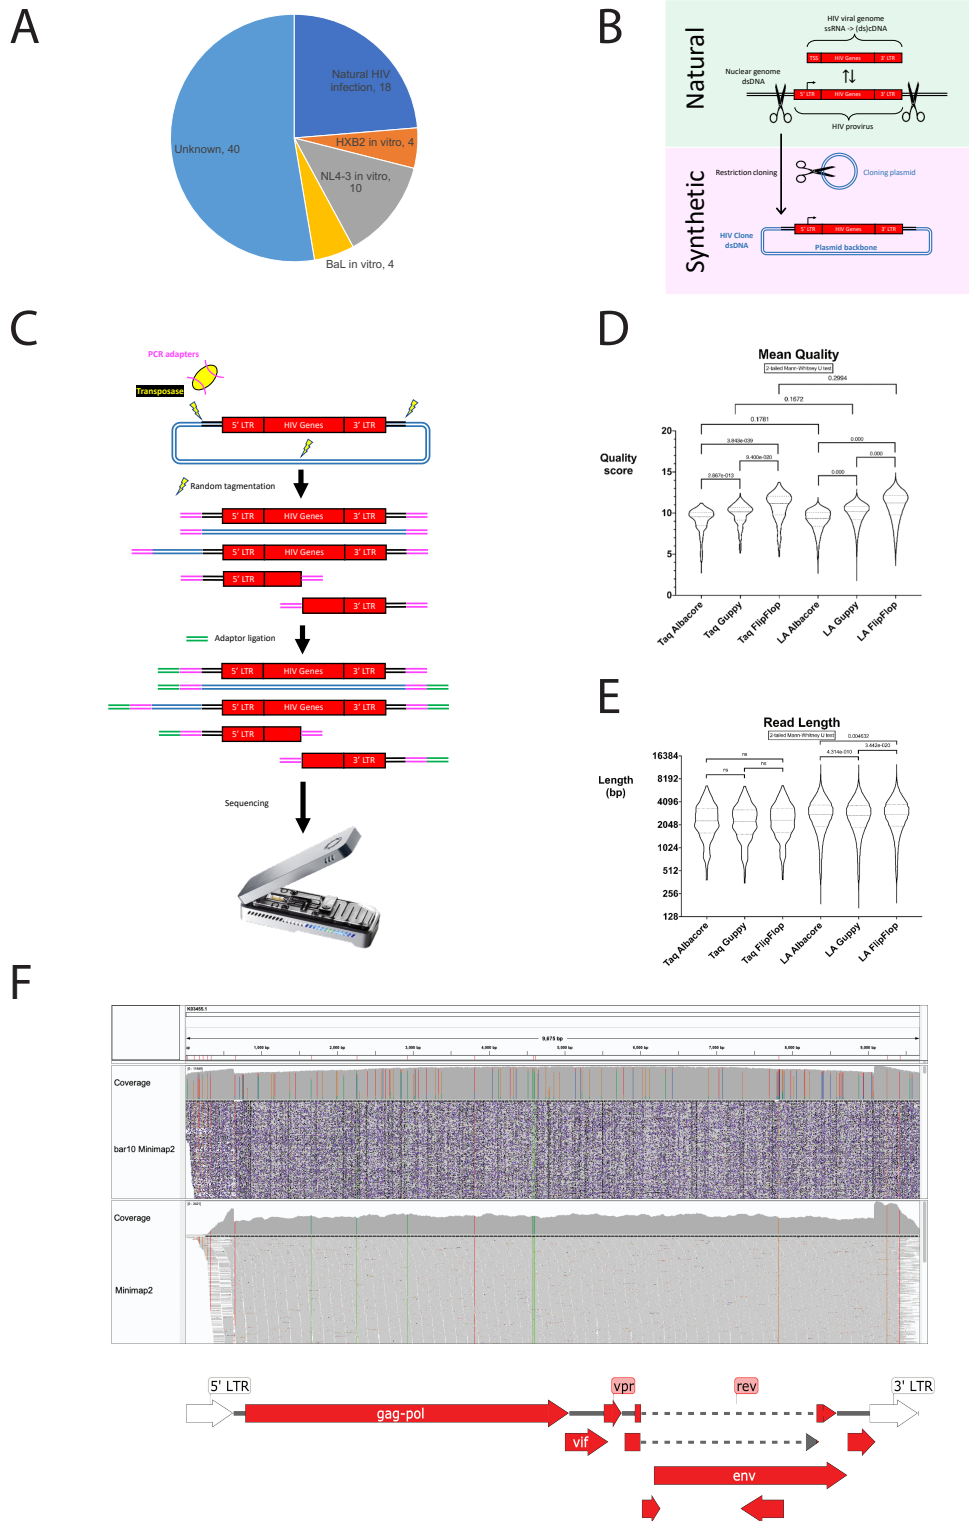

614 Figure 1A: HXB2 is still a commonly used resource. It is the reference HIV-1 genome, derived  
615 from one of the earliest clinical isolates. While older HIV samples are occasionally rediscovered,  
616 they are not made routinely available to researchers. All public HIV-1 RNA-seq datasets were  
617 obtained from the NCBI SRA with the following search phrase: “HIV-1” AND “RNA-seq”.  
618 Metadata from these 2527 runs (number current as of 7/21/2020) were used to make a pie chart  
619 summary.

620 Figure 1B: HIV information comes from three main sources: proviruses (HIV sandwiched  
621 between two assumedly identical full-length long terminal repeats (LTRs)), unspliced HIV  
622 mRNAs (also known as viral genomes) starting from the transcription start site and ending in the  
623 3’ LTR [4], and engineered proviruses recovered in their entirety or stitched together from  
624 multiple isolates like NL4-3 [18].

625 Figure 1C: ONT library prep pipeline. Tagmentation cleaves double-stranded DNA, ligating  
626 barcoded PCR adapters (magenta). PCR-adapted DNA may be amplified. After amplification  
627 and cleanup, ONT sequencing adapters (green) are ligated. Barcoded samples may be pooled and  
628 sequenced.

629 Figure 1D: Newer basecallers increase read mean quality. Median (big dash) and quartiles (little  
630 dash). Effect of enzyme version was not statistically significant.

631 Figure 1E: Read stats with different callers/aligners. Median (big dash) and quartiles (little dash).  
632 Read lengths increase with higher fidelity Taq.

633 Figure 1F: Sequencing coverage with long- vs. short-read single-end 150 bp (trimmed to 142 bp)  
634 DNA sequencing. Long-read sequencing covers ambiguously mappable areas missed by short-  
635 read in HXB2 reference Genbank:K03455.1 (**Supplemental Figures 3D,3E**), but at the expense  
636 of accuracy near homopolymers longer than about 4 nucleobases (**Supplemental Figure 5**).

637 Short-read mapping fails at repetitive elements longer than their read lengths (**Supplemental**  
638 **Figures 3D,3E**). Long read Minimap2 settings: map-ont -k15. Short read Minimap2 settings:  
639 Short reads without splicing (-k21 -w11 --sr -F800 -A2 -B8 -O12,32 -E2,1 -r50 -p.5 -N20 -  
640 f1000,5000 -n2 -m20 -s40 -g200 -2K50m --heap-sort=yes --secondary=no) (sr).  
641  
642  
643





646 The 5<sup>th</sup> longest read in the barcode 10 set (read ID 6fbf0205-5195-460e-8e28-930db50e5d79)  
647 contained full-length HIV-1. Query (full read) blastn against HIV (taxid:11676) returned 92.95%  
648 identity to HIV-1, complete genome (Genbank:AF033819.3). Limiting query to HXB2 (red)  
649 blastn against Nucleotide collection nr/nt returned 100% coverage and 93.02% identity to HIV-1  
650 HXB2. This read was 11,487 bases long, with mean quality score 11.984396. Basecalled using  
651 Guppy 2.3.1 with FlipFlop config.  
652

653 **Figure 3A: pHXB2\_D has identical LTRs, resolving likely errors in HXB2 (K03455.1)**

```
654 CLUSTAL format alignment by MAFFT (v7.475)
655
656
657 K03455.1_5'LTR   tggaagggctaattcactcccaacgaagacaagatatccttgatctgtggatctaccaca
658 pHXB2_D_5'LTR   tggaagggctaattcactcccaagaagacaagatatccttgatctgtggatctaccaca
659 pHXB2_D_3'LTR   tggaagggctaattcactcccaagaagacaagatatccttgatctgtggatctaccaca
660 K03455.1_3'LTR   tggaagggctaattcactcccaagaagacaagatatccttgatctgtggatctaccaca
661 *****
662
663 K03455.1_5'LTR   cacaaggctacttccctgattagcagaactacacaccagggccagggatcagatatccac
664 pHXB2_D_5'LTR   cacaaggctacttccctgattagcagaactacacaccagggccaggggtcagatatccac
665 pHXB2_D_3'LTR   cacaaggctacttccctgattagcagaactacacaccagggccaggggtcagatatccac
666 K03455.1_3'LTR   cacaaggctacttccctgattagcagaactacacaccagggccaggggtcagatatccac
667 *****
668
669 K03455.1_5'LTR   tgacctttggatggtgctacaagctagtaccagttgagccagagaaggtagaagaagcca
670 pHXB2_D_5'LTR   tgacctttggatggtgctacaagctagtaccagttgagccagataaggtagaagaggcca
671 pHXB2_D_3'LTR   tgacctttggatggtgctacaagctagtaccagttgagccagataaggtagaagaggcca
672 K03455.1_3'LTR   tgacctttggatggtgctacaagctagtaccagttgagccagataagatagaagaggcca
673 *****
674
675 K03455.1_5'LTR   acaaaggagagaaacaccagcttgttacaccctgtgagcctgcatggaatggatgaccgg
676 pHXB2_D_5'LTR   ataaaggagagaaacaccagcttgttacaccctgtgagcctgcatgggatggatgaccgg
677 pHXB2_D_3'LTR   ataaaggagagaaacaccagcttgttacaccctgtgagcctgcatgggatggatgaccgg
678 K03455.1_3'LTR   ataaaggagagaaacaccagcttgttacaccctgtgagcctgcatgggatggatgaccgg
679 *.....
680
681 K03455.1_5'LTR   agagagaagtgttagagtggaggtttgacagccgcctagcatttcatcacatggcccag
682 pHXB2_D_5'LTR   agagagaagtgttagagtggaggtttgacagccgcctagcatttcatcacgtggcccag
683 pHXB2_D_3'LTR   agagagaagtgttagagtggaggtttgacagccgcctagcatttcatcacgtggcccag
684 K03455.1_3'LTR   agagagaagtgttagagtggaggtttgacagccgcctagcatttcatcacgtggcccag
685 *****
686
687 K03455.1_5'LTR   agctgcatccggagtacttcaagaactgctgacatcgagcttctacaagggactttccg
688 pHXB2_D_5'LTR   agctgcatccggagtacttcaagaactgctgatatcgagcttctacaagggactttccg
689 pHXB2_D_3'LTR   agctgcatccggagtacttcaagaactgctgatatcgagcttctacaagggactttccg
690 K03455.1_3'LTR   agctgcatccggagtacttcaagaactgctgacatcgagcttctacaagggactttccg
691 *****
692
693 K03455.1_5'LTR   ctggggactttccagggaggcgtggcctgggaggactggggagtgggcgagccctcagat
```

```
694 pHXB2_D_5'LTR ctggggactttccagggagggcgtggcctgggcgggactggggagtggcgagccctcagat
695 pHXB2_D_3'LTR ctggggactttccagggagggcgtggcctgggcgggactggggagtggcgagccctcagat
696 K03455.1_3'LTR ctggggactttccagggagggcgtggcctgggcgggactggggagtggcgagccctcagat
697 *****
698
699 K03455.1_5'LTR cctgcatataagcagctgctttttgcctgtactgggtctctctgggttagaccagatctga
700 pHXB2_D_5'LTR cctgcatataagcagctgctttttgcctgtactgggtctctctgggttagaccagatctga
701 pHXB2_D_3'LTR cctgcatataagcagctgctttttgcctgtactgggtctctctgggttagaccagatctga
702 K03455.1_3'LTR cctgcatataagcagctgctttttgcctgtactgggtctctctgggttagaccagatctga
703 *****
704
705 K03455.1_5'LTR gcctgggagctctctgggctaactaggggaaccactgcttaagcctcaataaagcttgccct
706 pHXB2_D_5'LTR gcctgggagctctctgggctaactaggggaaccactgcttaagcctcaataaagcttgccct
707 pHXB2_D_3'LTR gcctgggagctctctgggctaactaggggaaccactgcttaagcctcaataaagcttgccct
708 K03455.1_3'LTR gcctgggagctctctgggctaactaggggaaccactgcttaagcctcaataaagcttgccct
709 *****
710
711 K03455.1_5'LTR tgagtgcttcaagtagtgtgtgcccgtctgttgtgtgactctggtaactagagatccctc
712 pHXB2_D_5'LTR tgagtgcttcaagtagtgtgtgcccgtctgttgtgtgactctggtaactagagatccctc
713 pHXB2_D_3'LTR tgagtgcttcaagtagtgtgtgcccgtctgttgtgtgactctggtaactagagatccctc
714 K03455.1_3'LTR tgagtgcttcaagtagtgtgtgcccgtctgttgtgtgactctggtaactagagatccctc
715 *****
716
717 K03455.1_5'LTR agacccttttagtcagtggtggaaaatctctagca
718 pHXB2_D_5'LTR agacccttttagtcagtggtggaaaatctctagca
719 pHXB2_D_3'LTR agacccttttagtcagtggtggaaaatctctagca
720 K03455.1_3'LTR agacccttttagtcagtggtggaaaatctctagca
721 *****
```

722

723

724 **Figure 3B: pNL4-3\_gag-pol( $\Delta$ 1443-4553)\_EGFP (ACCESSION\_TBD) has distinct LTRs,**  
725 **consistent with pNL4-3 (AF324493.1)**

```
726 CLUSTAL format alignment by MAFFT (v7.475)
727
728
729 AF324493.1_5LTR  tggaagggctaatttgggtcccaaaaaagacaagagatccttgatctgtggatctaccaca
730 ACCESSION_TBD_5  tggaagggctaatttgggtcccaaaaaagacaagagatccttgatctgtggatctaccaca
731 AF324493.1_3LTR  tggaagggctaattcactcccaagaagacaagatatccttgatctgtggatctaccaca
732 ACCESSION_TBD_3  tggaagggctaattcactcccaagaagacaagatatccttgatctgtggatctaccaca
733 *****.. *****.***** *****
734
735 AF324493.1_5LTR  cacaaggctacttccctgattggcagaactacacaccagggccagggatcagatatccac
736 ACCESSION_TBD_5  cacaaggctacttccctgattggcagaactacacaccagggccagggatcagatatccac
737 AF324493.1_3LTR  cacaaggctacttccctgattggcagaactacacaccagggccaggggtcagatatccac
738 ACCESSION_TBD_3  cacaaggctacttccctgattggcagaactacacaccagggccaggggtcagatatccac
739 *****.*****
740
741 AF324493.1_5LTR  tgacctttggatggtgcttcaagttagtaccagttgaaccagagcaagtagaagaggcca
742 ACCESSION_TBD_5  tgacctttggatggtgcttcaagttagtaccagttgaaccagagcaagtagaagaggcca
743 AF324493.1_3LTR  tgacctttggatggtgctacaagctagtaccagttgagccagataaggtagaagaggcca
744 ACCESSION_TBD_3  tgacctttggatggtgctacaagctagtaccagttgagccagataaggtagaagaggcca
745 ***** ****.*****.***** *.*****
746
747 AF324493.1_5LTR  atgaaggagagaacaacagcttgttacaccctatgagccagcatgggatggaggaccgg
748 ACCESSION_TBD_5  atgaaggagagaacaacagcttgttacaccctatgagccagcatgggatggaggaccgg
749 AF324493.1_3LTR  ataaaggagagaacaccagcttgttacaccctgtgagcctgcatggaatggatgaccctg
750 ACCESSION_TBD_3  ataaaggagagaacaccagcttgttacaccctgtgagcctgcatggaatggatgaccctg
751 **..***** *****.***** *****.***** ***** *
752
753 AF324493.1_5LTR  agggagaagtattagtgtggaagtttgacagcctcctagcatttcgtcacatggcccag
754 ACCESSION_TBD_5  agggagaagtattagtgtggaagtttgacagcctcctagcatttcgtcacatggcccag
755 AF324493.1_3LTR  agagagaagtgttagagtggaggttgacagccgcctagcatttcacacgtggcccag
756 ACCESSION_TBD_3  agagagaagtgttagagtggaggttgacagccgcctagcatttcacacgtggcccag
757 **..*****.**** *****.***** *****.*****.*****
758
759 AF324493.1_5LTR  agctgcatccggagtactacaaagactgctgacatcgagctttctacaagggactttccg
760 ACCESSION_TBD_5  agctgcatccggagtactacaaagactgctgacatcgagctttctacaagggactttccg
761 AF324493.1_3LTR  agctgcatccggagtacttcaagaactgctgacatcgagcttgctacaagggactttccg
762 ACCESSION_TBD_3  agctgcatccggagtacttcaagaactgctgacatcgagcttgctacaagggactttccg
763 ***** **..***** ***** *****
```

764  
765 AF324493.1\_5LTR ctggggactttccagggaggtgtggcctgggcgggactggggagtggcgagccctcagat  
766 ACCESSION\_TBD\_5 ctggggactttccagggaggtgtggcctgggcgggactggggagtggcgagccctcagat  
767 AF324493.1\_3LTR ctggggactttccagggagggcgtggcctgggcgggactggggagtggcgagccctcagat  
768 ACCESSION\_TBD\_3 ctggggactttccagggagggcgtggcctgggcgggactggggagtggcgagccctcagat  
769 \*\*\*\*\*.\*\*\*\*\*  
770  
771 AF324493.1\_5LTR gctacatataagcagctgctttttgcctgtactgggtctctctggtttagaccagatctga  
772 ACCESSION\_TBD\_5 gctacatataagcagctgctttttgcctgtactgggtctctctggtttagaccagatctga  
773 AF324493.1\_3LTR gctgcatataagcagctgctttttgcctgtactgggtctctctggtttagaccagatctga  
774 ACCESSION\_TBD\_3 gctgcatataagcagctgctttttgcctgtactgggtctctctggtttagaccagatctga  
775 \*\*\*.\*\*\*\*\*  
776  
777 AF324493.1\_5LTR gcctgggagctctctggctaactaggggaaccactgcttaagcctcaataaagcttgct  
778 ACCESSION\_TBD\_5 gcctgggagctctctggctaactaggggaaccactgcttaagcctcaataaagcttgct  
779 AF324493.1\_3LTR gcctgggagctctctggctaactaggggaaccactgcttaagcctcaataaagcttgct  
780 ACCESSION\_TBD\_3 gcctgggagctctctggctaactaggggaaccactgcttaagcctcaataaagcttgct  
781 \*\*\*\*\*  
782  
783 AF324493.1\_5LTR tgagtgctcaaagtagtgtgtgcccgctctggtgtgtgactctggtaactagagatccctc  
784 ACCESSION\_TBD\_5 tgagtgctcaaagtagtgtgtgcccgctctggtgtgtgactctggtaactagagatccctc  
785 AF324493.1\_3LTR tgagtgcttcaaagtagtgtgtgcccgctctggtgtgtgactctggtaactagagatccctc  
786 ACCESSION\_TBD\_3 tgagtgcttcaaagtagtgtgtgcccgctctggtgtgtgactctggtaactagagatccctc  
787 \*\*\*\*\*.\*\*\*\*\*  
788  
789 AF324493.1\_5LTR agacccttttagtcagtggtggaaaatctctagca  
790 ACCESSION\_TBD\_5 agacccttttagtcagtggtggaaaatctctagca  
791 AF324493.1\_3LTR agacccttttagtcagtggtggaaaatctctagca  
792 ACCESSION\_TBD\_3 agacccttttagtcagtggtggaaaatctctagca  
793 \*\*\*\*\*

794

795 **Figure 4A: HXB2 integration site**

796

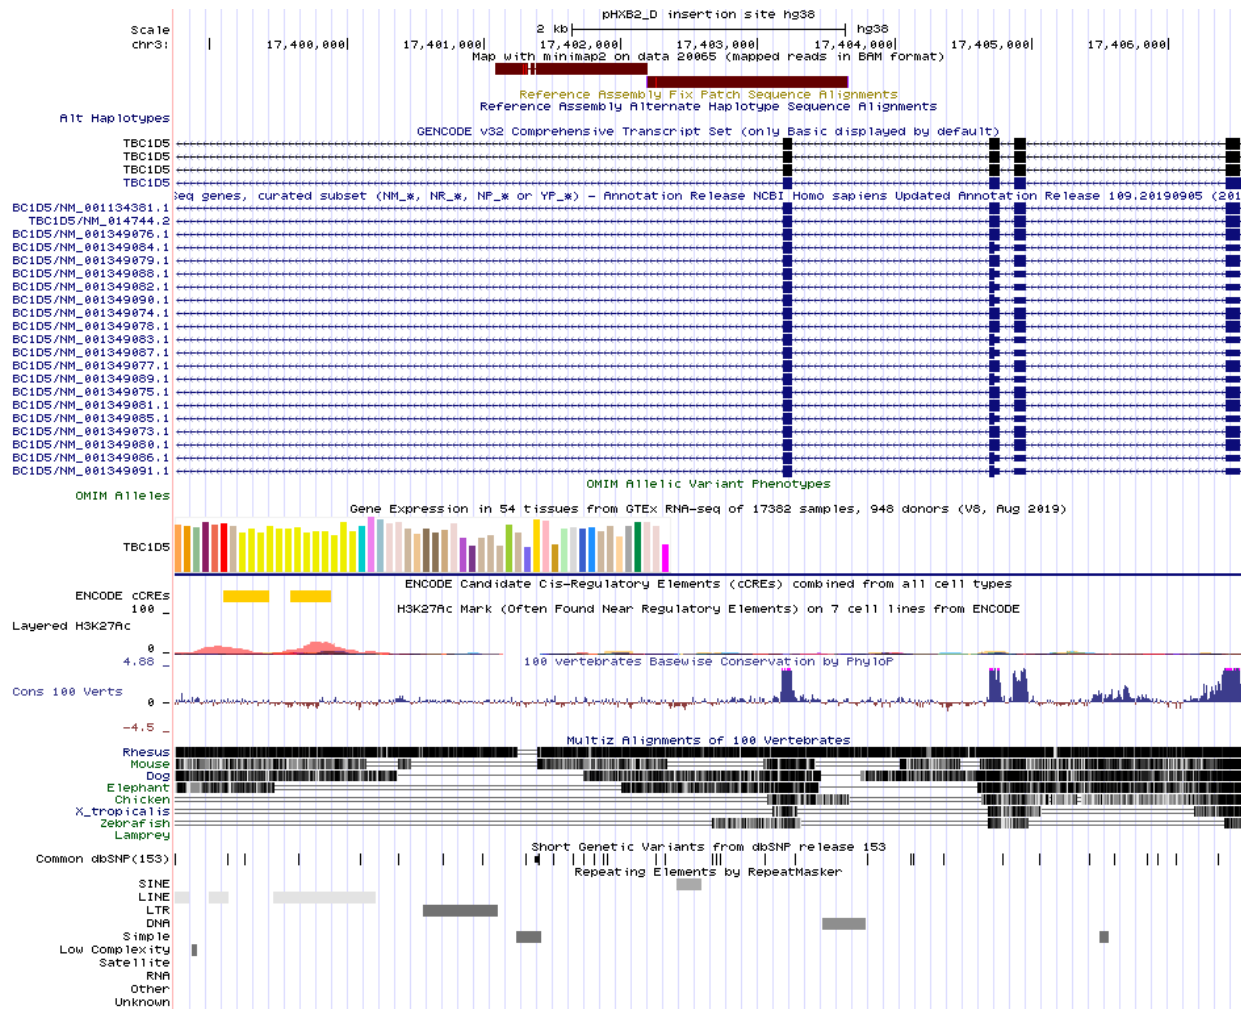

797

798

799

800 **Figure 4B: NL4-3 integration sites**

801

802

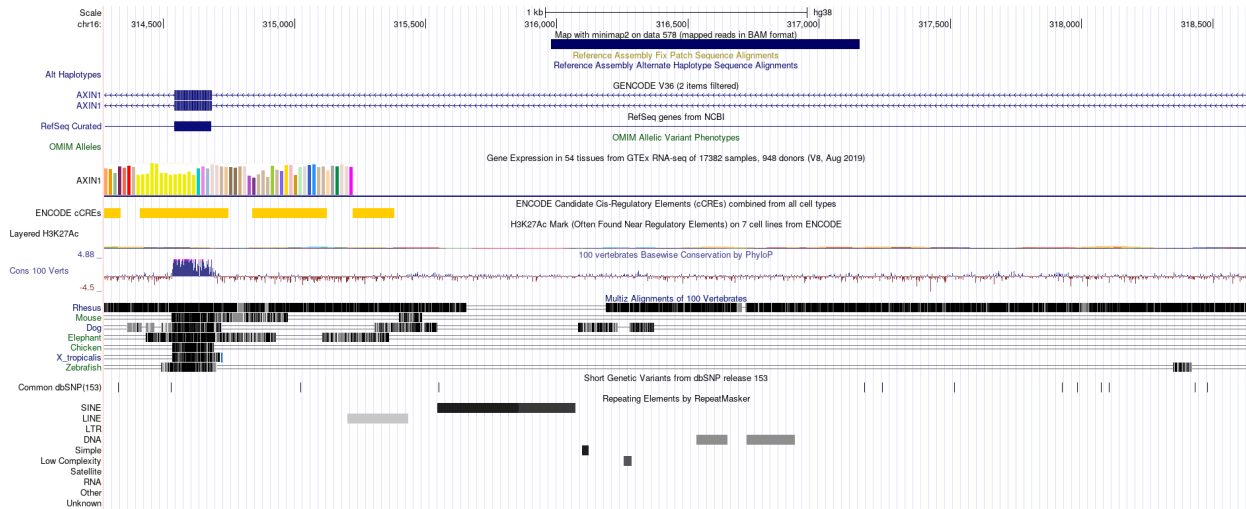

803

804

805

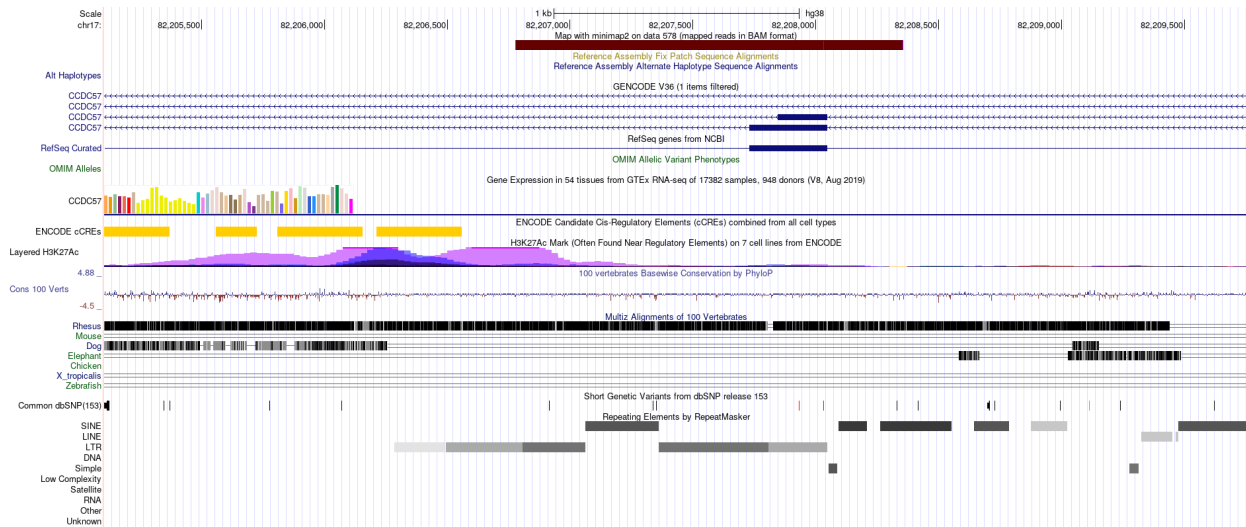

806

807

808 Figure 4A: pHXB2\_D's, and therefore HXB2's, integration site is unambiguously singular (falls  
809 outside of annotated repeat), and in the same orientation (minus strand relative to hg38) as target  
810 gene TBC1D5. Alignment quality is 60 for both homology arms (**Supplemental Table 2**).

811 Features captured by homology arms in pHXB2\_D and other clones verified as proviruses in the  
812 present study are consistent with HIV-1 integration behavior [44]. Visualized in UCSC Genome

813 Browser [45]. Figure 4B: pNL4-3\_gag-pol( $\Delta$ 1443-4553)\_EGFP's, and therefore NL4-3's,  
814 integration sites fall on annotated repeats, the longer reads help to locate both sites. Alignment  
815 quality is 60 for both homology arms (**Supplemental Table 2**). These integration sites would  
816 likely be missed by any method leveraging reads shorter than the homology arms.  
817



818 **Figure 5: pHXB2\_D provenance and top 50 neighbors**

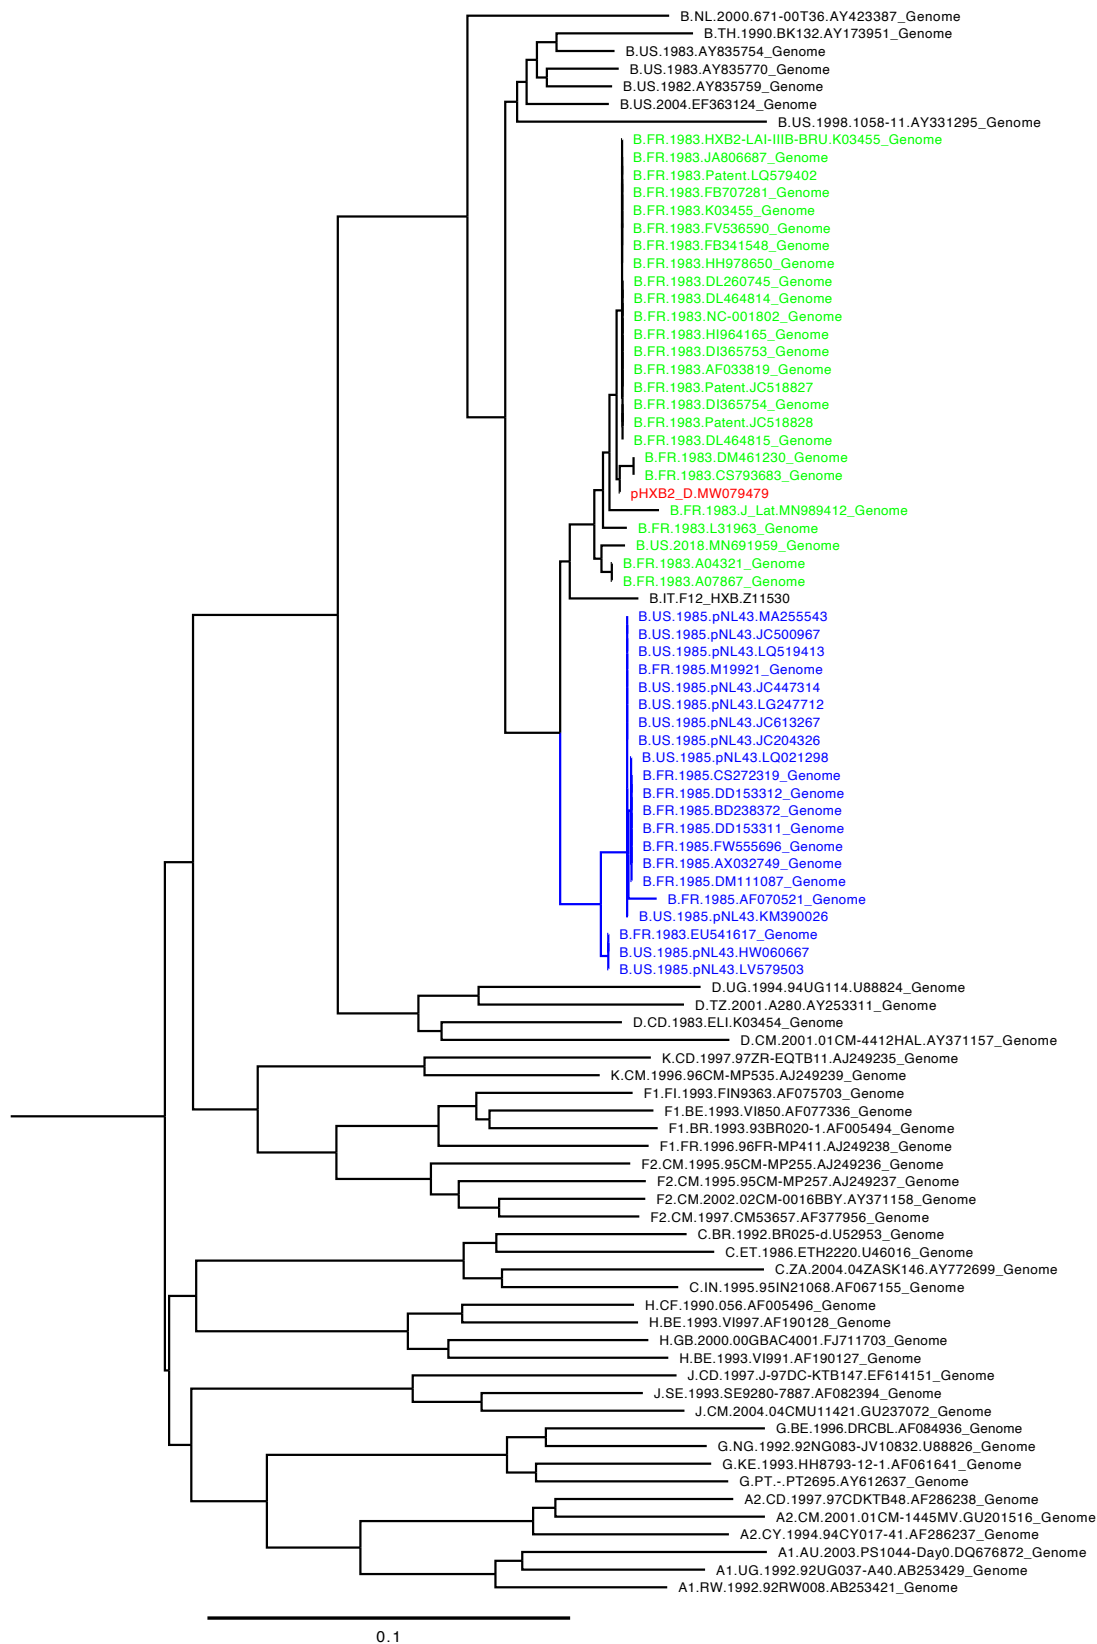

820 Figure 6: Summary of long- vs. short-read mapping by ability to phase LTRs

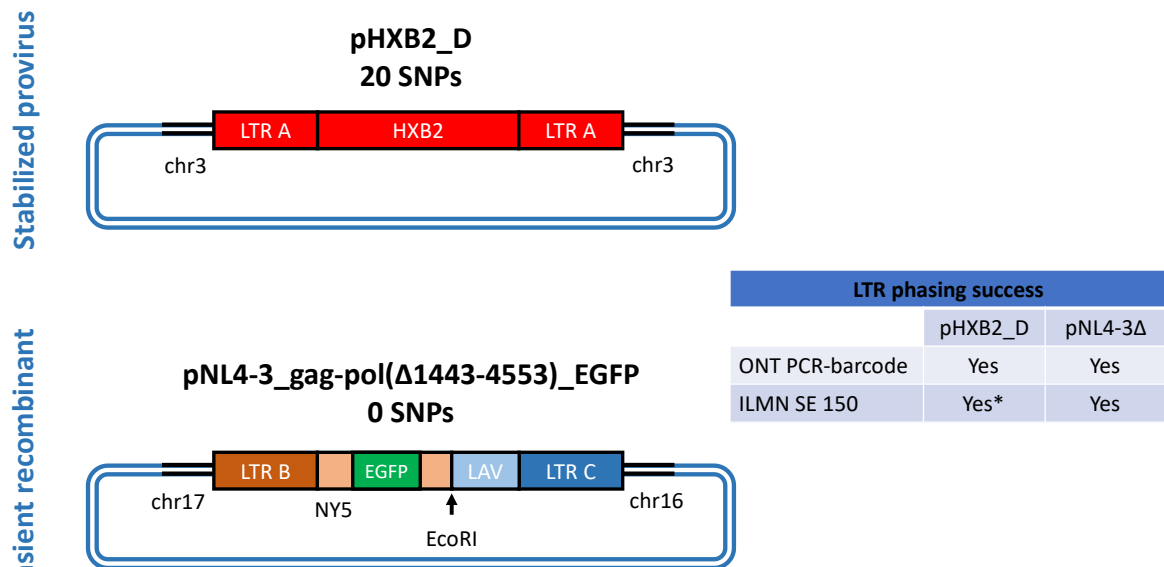

821

LTR C takes over in subsequent viruses.

\*intermittent success with ambiguous mapping at LTR.

## 822 **Supplemental Information**

823 **Data exploration with long- and short-read mapping**

824 To assemble pHXB2\_D, we tried the following short read assemblers on short-read data  
825 from the external core: IDBA [46], MIRA [47], [48], SPAdes [49], and SSAKE [50], [51]. These  
826 were chosen as a convenience because they were already stably implemented in Galaxy  
827 (specifically usegalaxy.eu). Of these, SSAKE produced discontinuous assemblies with default  
828 parameters. The discontinuous contigs did however map to the core's assembly (not shown).

829 **Enabling STEM outreach**

830 This work was performed as two control experiments with identically prepared libraries  
831 for a STEM outreach initiative, Student Genomics (Gener, et al., manuscript in prep). Given the  
832 constraints of the Student Genomics pilot, a rapid sequencing kit with tagmentation (explained  
833 below) with PCR barcoding was used to pool samples for ONT sequencing, with the  
834 consequence of fragmenting plasmid DNA more than what would have been ideal for capturing  
835 full-length HIV. That said, these controls could have been just as easily replaced by any  
836 samples/experiments benefiting from long-read sequencing at moderate-to-high coverage.

837

838 **Supplemental Tables**

839

840

841 **Supplemental Table 1: HXB2 is still a common HIV clone.**

842 **See Supplemental Digital Content.**

843 **See also Figure 1A.**

844

845

846

847 **Supplemental Table 2: HIV provirus clones**

848 **See Supplemental Digital Content.**

849 Of the HIV clones available through ARP, the table represents the only validated proviruses with  
850 both upstream and downstream homology arms mapping to the same integration sites. pNL4-3 is  
851 included as a known chimera with two integration half-sites. Other clones were made with  
852 cDNA cloning, usually TA cloning (per ARP entries). Note: Reference hg38. Aligner: minimap2  
853 with "Long Assembly" mapping settings. All homology arms had Alignment quality = 60.  
854 Upstream = host plus strand; independent of integration orientation. Coordinates reported from  
855 UCSC. ARP = NIH AIDS Reagent and Reference Program. IS = integration site.

856 **Supplemental Table 3: Variation in assemblies at the feature level.**

|                   | Mismatches |       |          |          |       |          | Gaps (INDEL) |       |          |          |       |          |
|-------------------|------------|-------|----------|----------|-------|----------|--------------|-------|----------|----------|-------|----------|
|                   | Taq        |       |          | LA Taq   |       |          | Taq          |       |          | LA Taq   |       |          |
|                   | Albacore   | Guppy | FlipFlop | Albacore | Guppy | FlipFlop | Albacore     | Guppy | FlipFlop | Albacore | Guppy | FlipFlop |
| 5' LTR            | NA         | 9     | 9        | 9        | 9     | 9        | NA           | NA    | 0        | 2        | 0     | 0        |
| gag               | 2          | 2     | 2        | 2        | 2     | 2        | 12           | 10    | 9        | 9        | 8     | 8        |
| 5' LTR+ψ          | 10         | 10    | NA       | NA       | NA    | NA       | 5            | 2     | NA       | NA       | NA    | NA       |
| pol               | 7          | 6     | 6        | 6        | 6     | 6        | 26           | 22    | 9        | 18       | 11    | 10       |
| vif               | 0          | 0     | 0        | 0        | 0     | 0        | 3            | 3     | 2        | 3        | 1     | 1        |
| vpr               | 0          | 0     | 0        | 0        | 0     | 0        | 1            | 1     | 1        | 0        | 0     | 0        |
| tat               | 2          | 1     | 1        | 1        | 1     | 1        | 10           | 6     | 3        | 7        | 4     | 5        |
| rev               | 2          | 1     | 1        | 1        | 1     | 1        | 10           | 7     | 4        | 7        | 4     | 5        |
| vpu               | 1          | 0     | 0        | 0        | 0     | 0        | 0            | 0     | 0        | 0        | 0     | 0        |
| gp160             | 2          | 1     | 1        | 1        | 1     | 1        | 11           | 7     | 4        | 8        | 4     | 5        |
| nef               | 1          | 1     | 1        | 1        | 1     | 1        | 3            | 2     | 2        | 3        | 2     | 1        |
| 3' LTR            | 2          | 2     | NA       | NA       | NA    | NA       | 2            | 0     | NA       | NA       | NA    | NA       |
| nef+3' LTR        | NA         | 2     | 2        | 2        | 2     | 2        | NA           | 2     | 2        | 5        | 2     | 1        |
| HXB2              | 22         | 20    | 20       | 20       | 20    | 20       | 61           | 46    | 28       | 47       | 27    | 25       |
| Downstream bridge | 0          | 0     | 0        | 0        | 0     | 0        | 4            | 5     | 1        | 2        | 1     | 1        |
| pBR322-related    | 0          | 0     | 0        | 0        | 0     | 0        | 19           | 19    | 13       | 18       | 19    | 15       |
| Upstream bridge   | 2          | 2     | 3        | 2        | 2     | 2        | 8            | 6     | 5        | 7        | 7     | 3        |

857

858 Assembled with Canu. NA denotes features which may not have matched exactly, but which

859 were collapsed with adjacent features to facilitate counting. Variants called manually by

860 mapping assemblies over HXB2 features with SnapGene.

861

862



863 **Supplemental Figures**

864

865 **Supplemental Figure 1A: Unbiased nanopore DNA sequencing coverage over HXB2**  
866 **depends on DNA polymerase and mapper. ONT basecaller = Albacore (worst).**

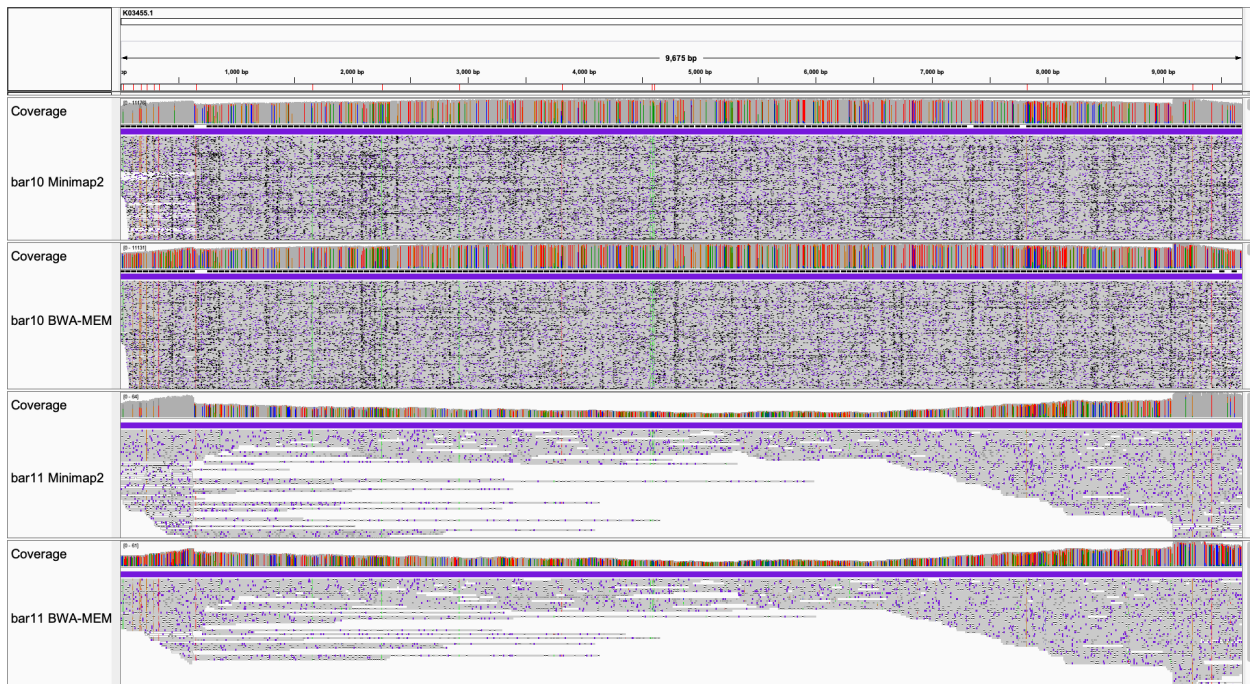

867  
868

869 **Supplemental Figure 1B: Unbiased nanopore DNA sequencing coverage over HXB2**

870 **depends on DNA polymerase and mapper. ONT basecaller = Guppy.**

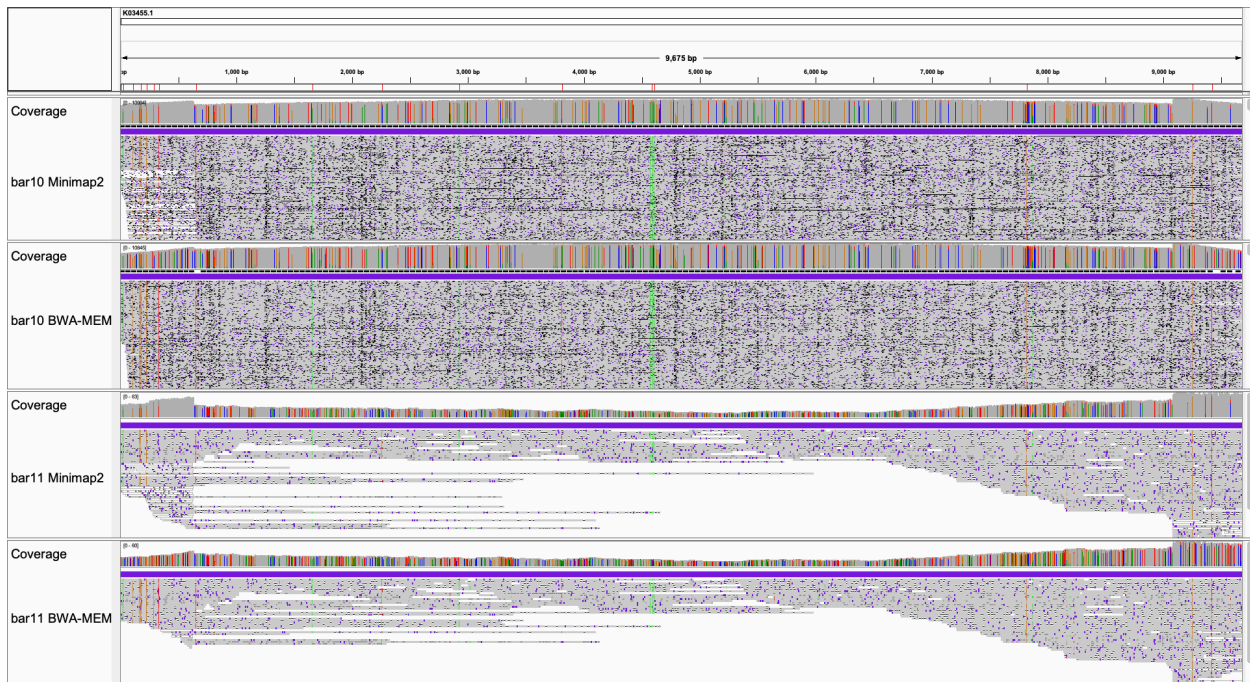

871  
872

873 **Supplemental Figure 1C: Unbiased nanopore DNA sequencing coverage over HXB2**

874 **depends on DNA polymerase and mapper. ONT basecaller = FlipFlop (best).**

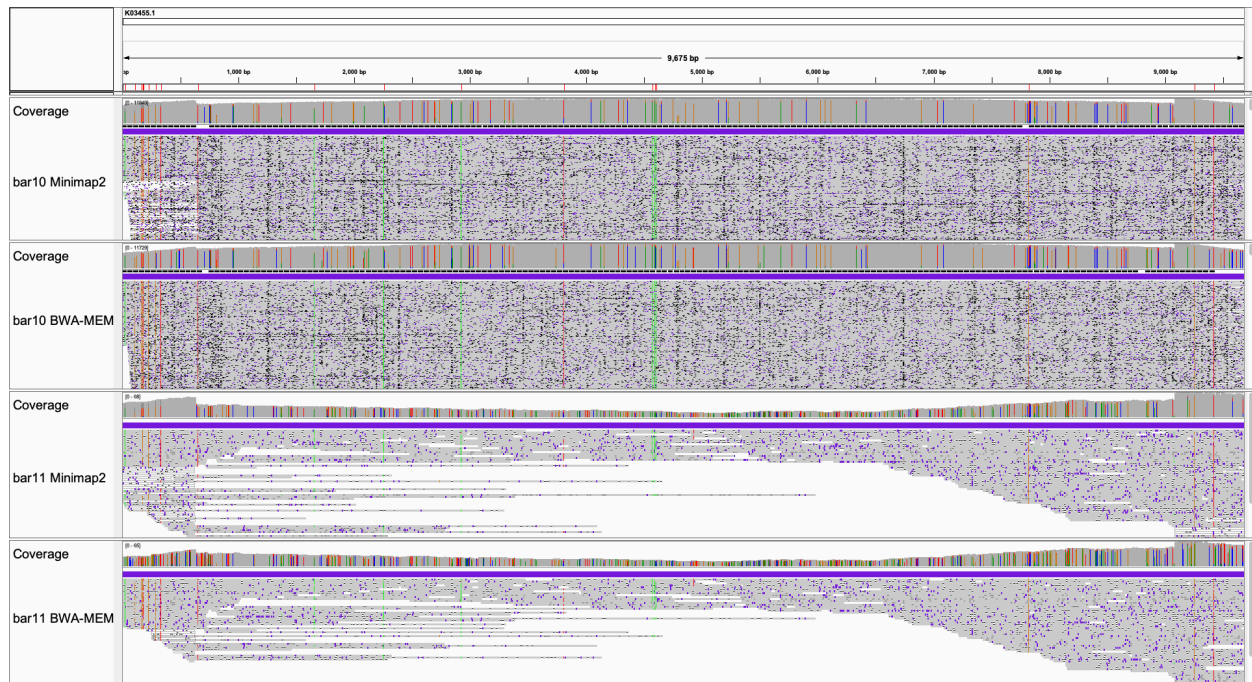

875  
876

877 Top two Coverage and Alignment panels from barcoded library 10 (bar10 = LA Taq). Bottom  
878 two from Barcode 11 (bar11 = Taq). Minimap2 and BWA-MEM were used to map reads  
879 basecalled with Albacore (worst), Guppy, or FlipFlop (best) to HXB2. Color-coding: Red below  
880 genome scale marks 20 SNVs across the HIV segment of pHXB2\_D. Purple is an insertion in a  
881 given read relative to reference. White is either a deletion in a given read or space between two  
882 aligned reads. Gray in alignment field means base same as reference, and in coverage field  
883 means major allele is at least 95% the same as reference. Per-read “insertions” and “deletions”  
884 do not necessarily represent true insertions or deletions actually present in the sample, because  
885 each read is likely an imperfect independent observation. Automated assembly followed by  
886 manual consensus building converts these overlapping reads into approximations of the ground  
887 truth. “Unbiased” refers to not amplifying a given region (e.g., pol) before ligating ONT  
888 sequencing adapters. In the present approach, the tagmentation process randomly cuts DNA,  
889 creating ~2000 bp pieces. Tagmented DNA is then amplified based on tagmentation adapters.  
890

891 **Supplemental Figure 2: Reads map well to HIV-1 NL4-3 segment of pNL4-3 assembly**  
892 **because NL4-3 LTRs are distinct.**

893

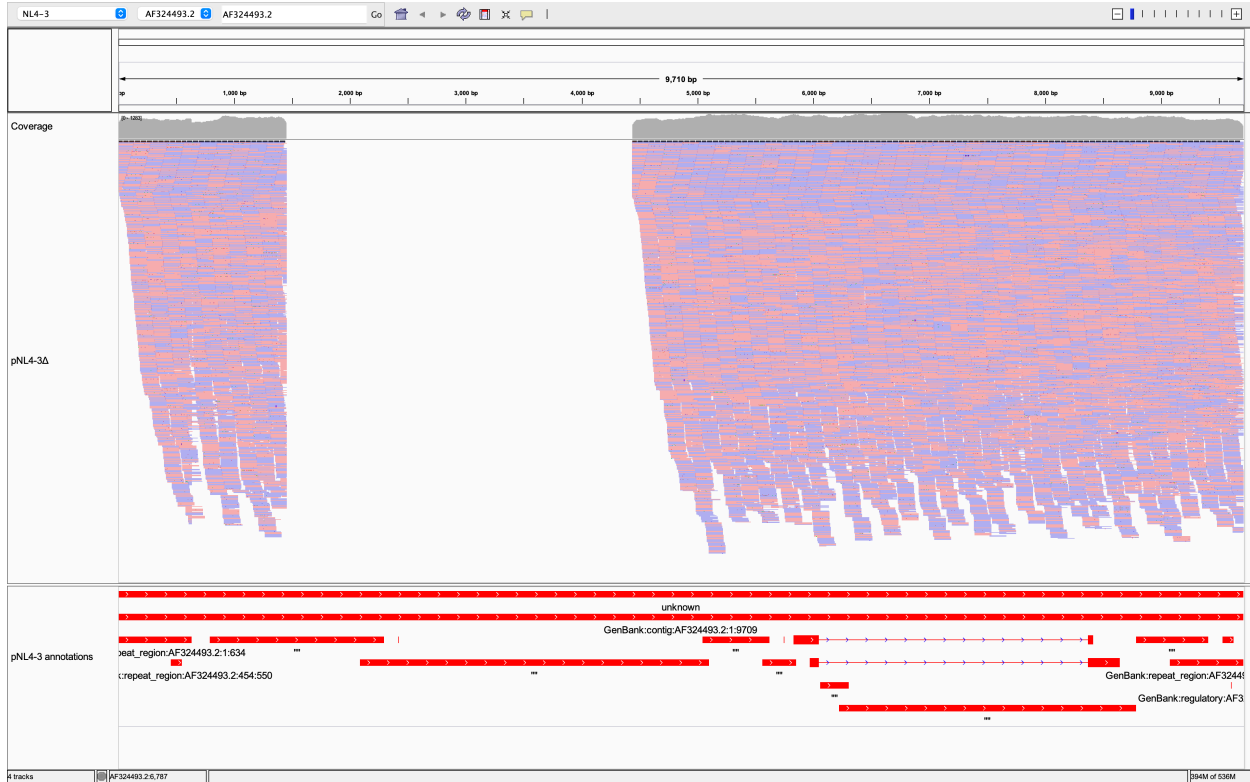

894  
895

896 **Supplemental Figure 3A: HIV single nucleotide variants (SNVs) in pHXB2\_D. ONT**

897 **basecaller = Albacore (worst).**

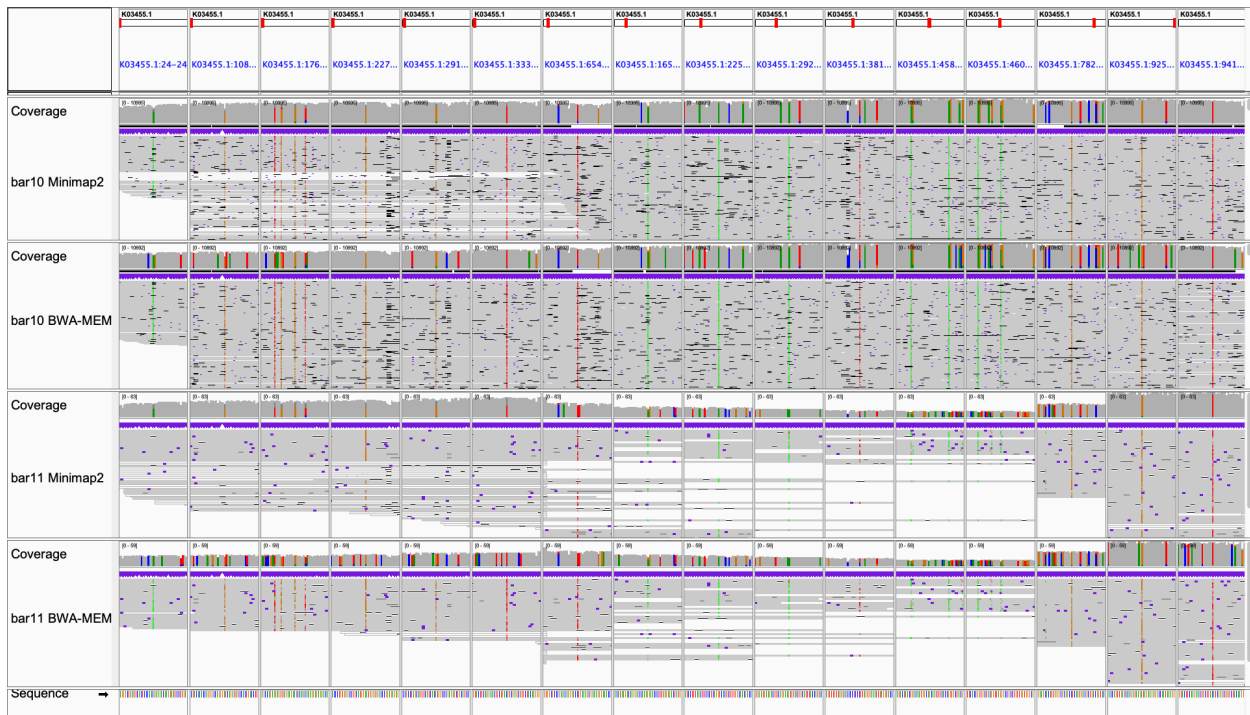

898  
899

900 **Supplemental Figure 3B: HIV single nucleotide variants (SNVs) in pHXB2\_D. ONT**

901 **basecaller = Guppy.**

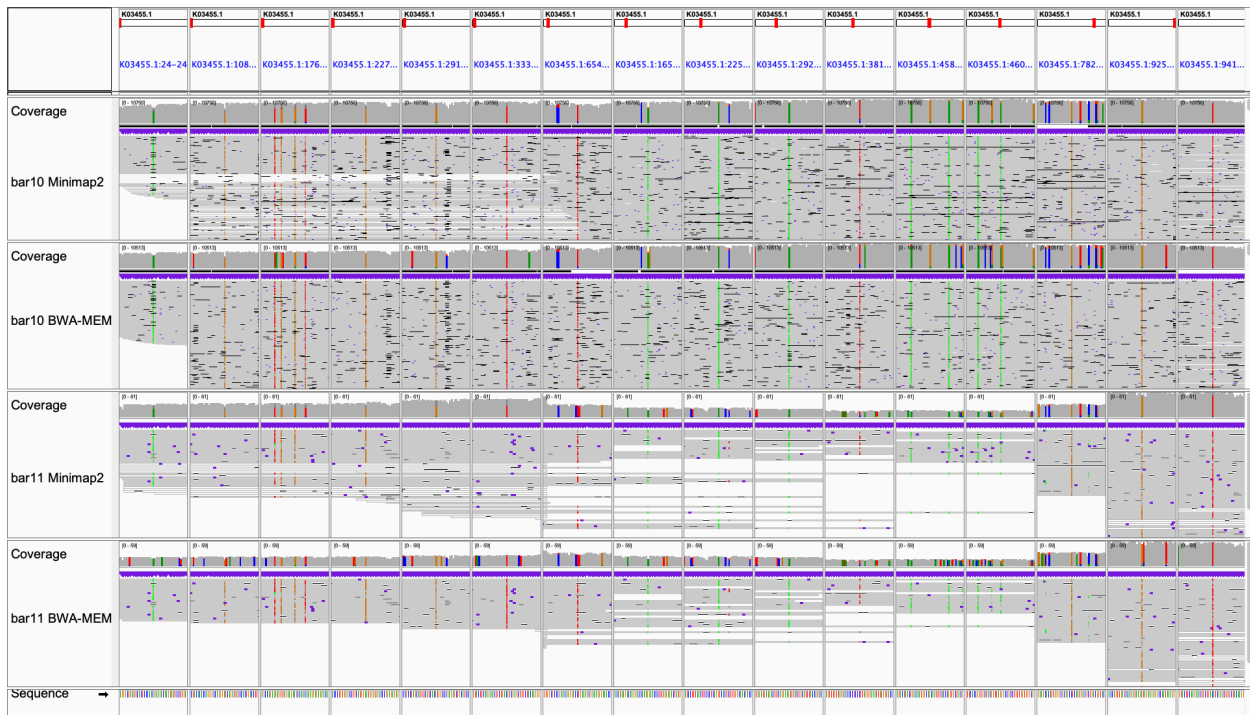



904 **Supplemental Figure 3C: HIV single nucleotide variants (SNVs) in pHXB2\_D. ONT**

905 **basecaller = FlipFlop (best).**

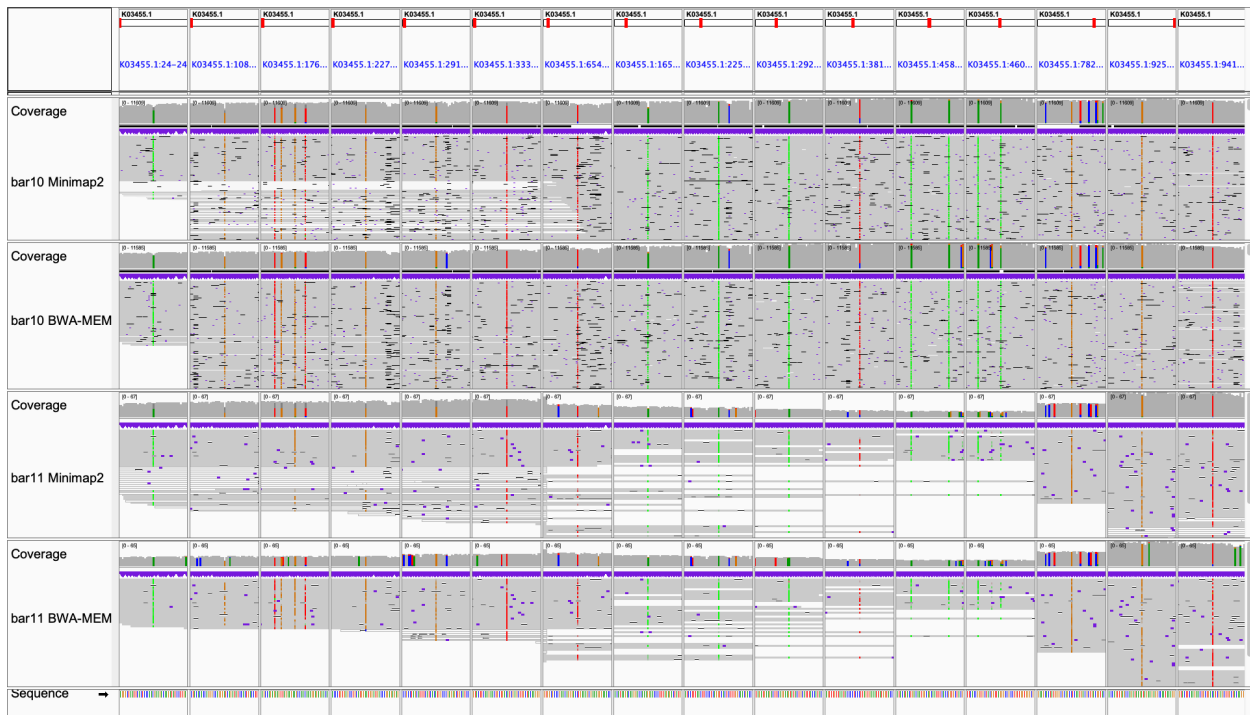

906  
907

908 **Supplemental Figure 3D: HIV single nucleotide variants (SNVs) in pHXB2\_D, long vs.**  
909 **short reads (HIV genome).**

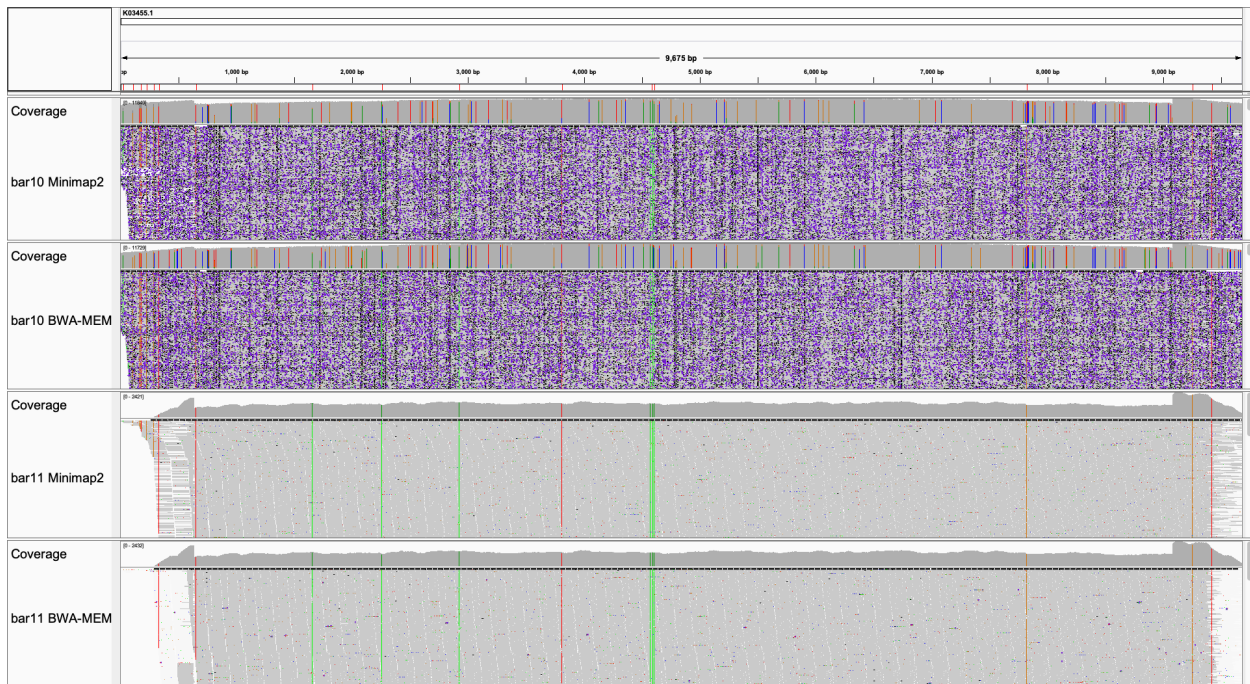

910  
911

912 **Supplemental Figure 3E: HIV single nucleotide variants (SNVs) in pHXB2\_D, long vs.**  
913 **short reads (20 SNV-focused).**

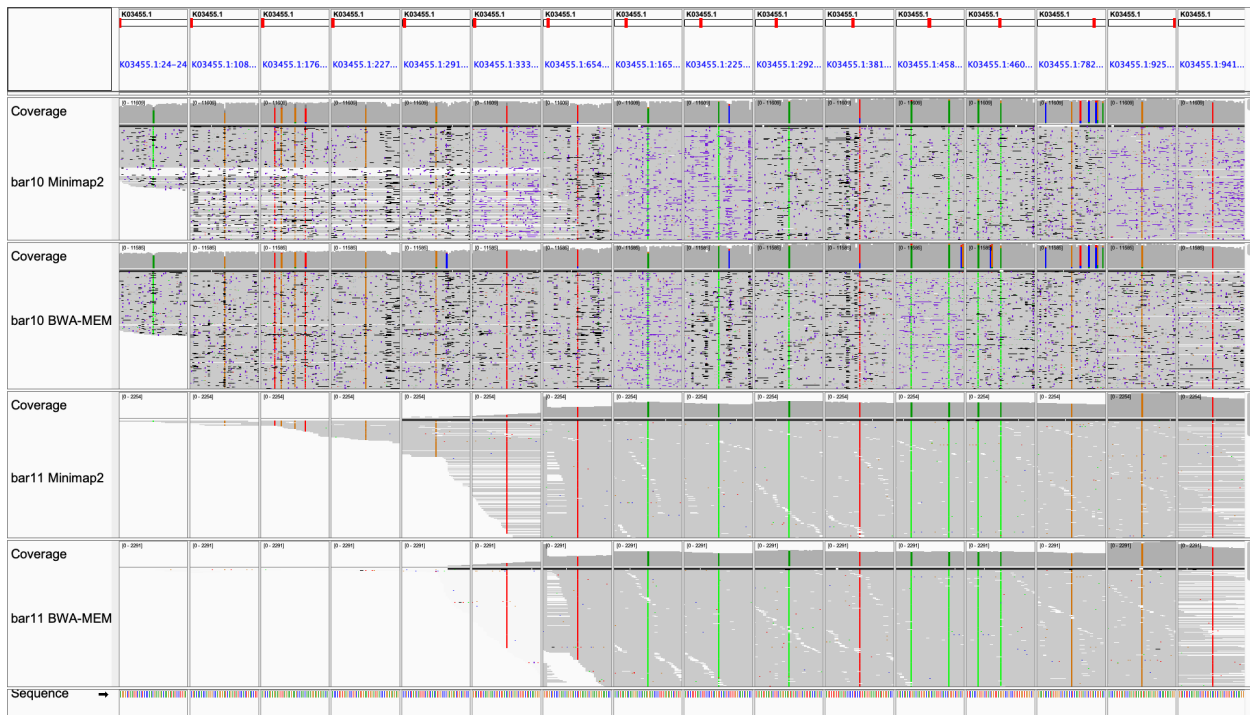

914  
915

916 Supplemental Figure 3A: HIV single nucleotide variants (SNVs) in pHXB2\_D. ONT basecaller  
917 = Albacore (worst). Gray indicates per-base consensus accuracy  $\geq 80\%$ . These alignments are  
918 the noisiest (less gray and most divergent from reference) between Supplemental Figures 3A,  
919 3B, and 3C.

920 Supplemental Figure 3B: HIV single nucleotide variants (SNVs) in pHXB2\_D. ONT basecaller  
921 = Guppy.

922 Supplemental Figure 3C: HIV single nucleotide variants (SNVs) in pHXB2\_D. ONT basecaller  
923 = FlipFlop (best). These alignments are the least noisy (most gray and like reference) between  
924 Supplemental Figures 3A, 3B, and 3C.

925 Supplemental Figure 3D: HIV single nucleotide variants (SNVs) in pHXB2\_D, long vs. short  
926 reads (HIV genome). Long reads outperform short reads at HIV-1 LTRs. ONT basecaller =  
927 FlipFlop. Short read as single-end 150, clipped to 142, provided by external core. Mappers =  
928 Minimap2 (better), BWA-MEM.

929 Supplemental Figure 3E: HIV single nucleotide variants (SNVs) in pHXB2\_D, long vs. short  
930 reads (SNV-focused).

931

932 **Supplemental Figure 4A: Assembling pHXB2\_D from long reads only, varying basecaller**  
933 **and polymerase.**

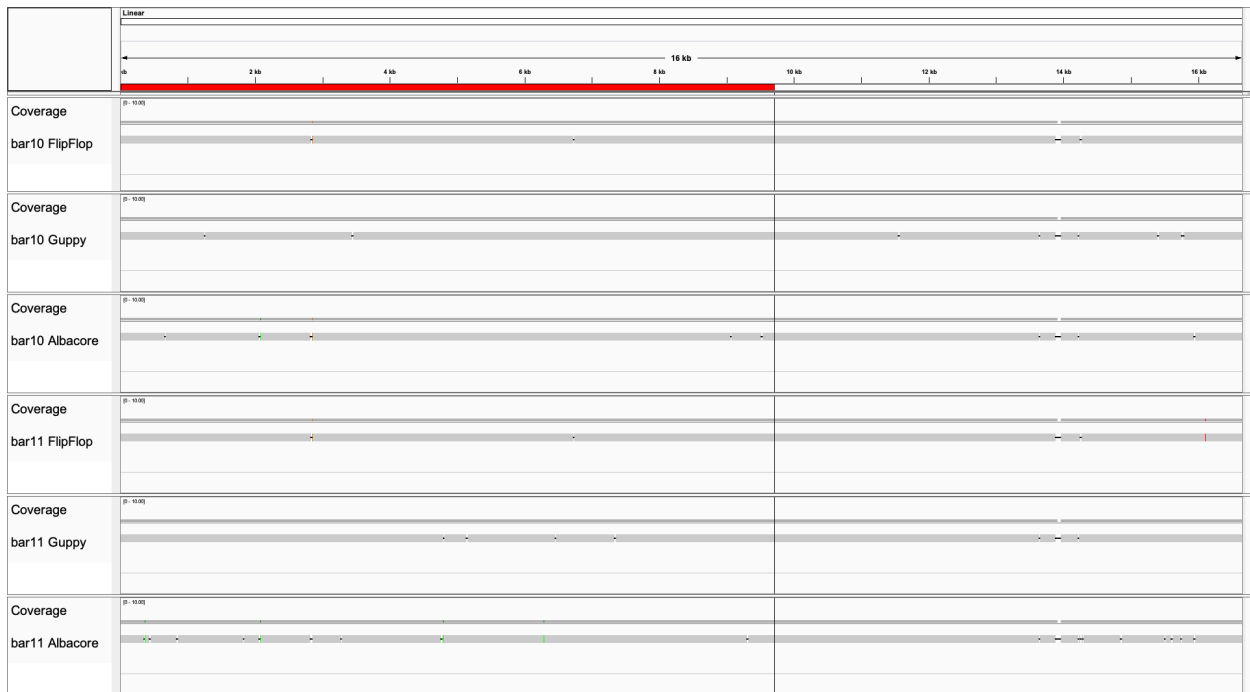

934 Each pane (n=6) summarizes the results of contig curation. Divergence from reference decreases  
935 with newer basecallers, and with long amplicon DNA polymerase (Sigma-Aldrich Taq vs. LA  
936 Taq by Takara). Errors in assembly occurred at homopolymers (most often deletions not visible  
937 at this resolution; see **Supplemental Figure 6**), dimer or trimer runs. bar10 = LA Taq library.  
938 bar11 = Taq library. pHXB2\_D Genbank:MW079479. Best contigs presented, manually curated  
939 to match pHXB2\_D coordinates. Note LTRs (beginning and terminal 634 bp of red bar) are  
940 resolved in almost all assemblies. See **Supplemental Table 3** for differences between assemblies  
941 and the reference (left red). Plasmid backbone (right) differences are not reported.  
942  
943

944 **Supplemental Figure 4B: ONT errors corrected by polishing ONT-only assemblies.**

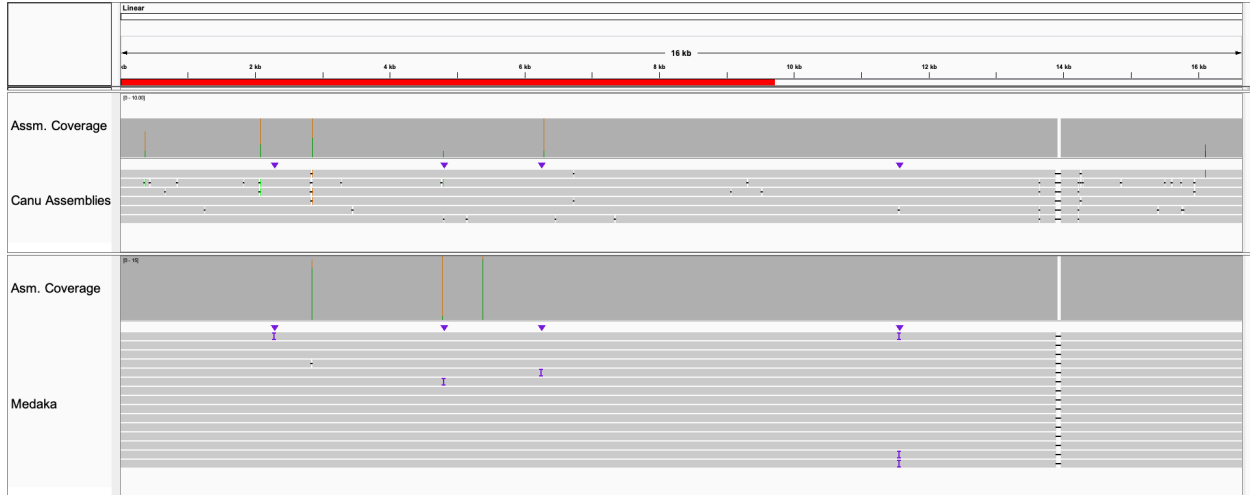

945

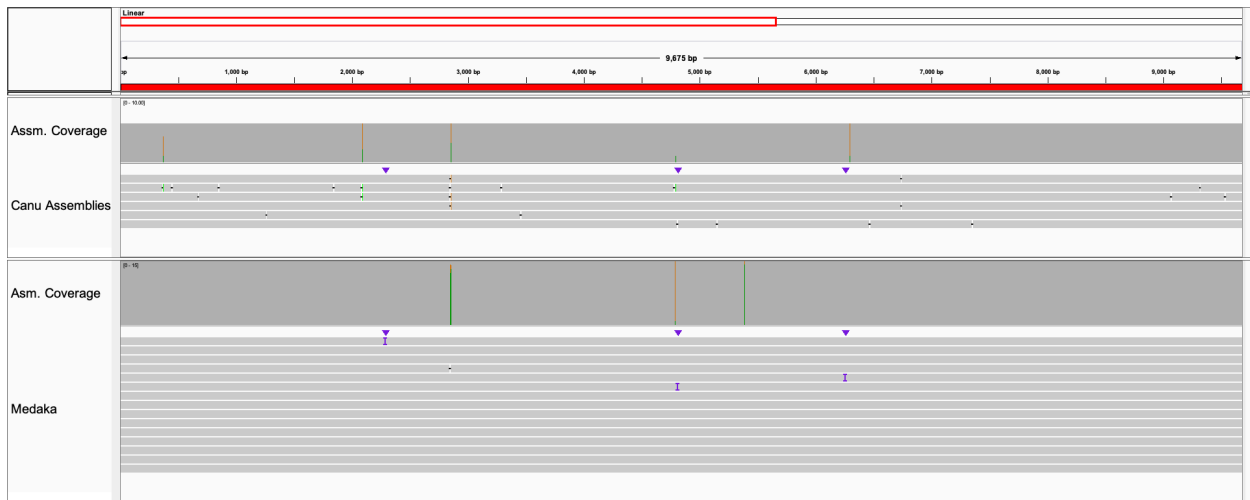

946

947 Assemblies polished with Medaka (ONT). Top: pHXB2\_D genome. Bottom: HIV-only segment.

948 The best polished assembly had one error in the entire plasmid (1 error out of 16,722 bases), with

949 a corresponding consensus accuracy of 99.99402%. This happened to be in HIV segment (HIV-1

950 between position 1 and 9719; 1 error out of 9719 bases ), with corresponding accuracy of

951 99.989711%. Note the conserved 52 bp gap in the backbone of pHXB2\_D was redundant

952 sequence included in the short-read assembly from the core. It was not supported by long-read

953 data, and therefor was validated as a technical artifact from the core's pipeline. Reference: short-

954 read assembly. LTRs (beginning and terminal 634 bp of red bar) are resolved in polished  
955 assemblies.

956 **Supplemental Figure 4C: Mappability of long reads over contigs during assembly quality**  
957 **control.**

958

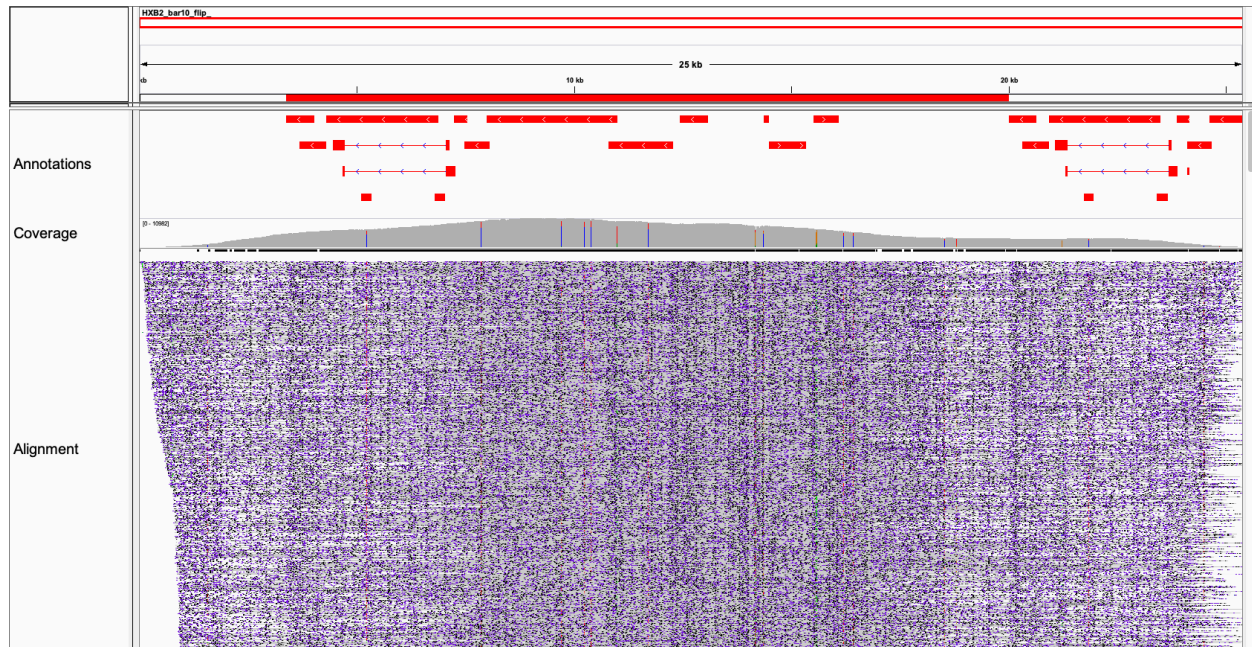

959

960 Coverage depends on context. Abrupt changes in coverage from terminal regions of HXB2

961 **(Figure 1F, Supplemental Figures 1 and 3)** were artifacts from supplying mappers with an

962 HIV reference without a plasmid backbone. Long reads from barcode 10 (LA Taq) mapped with

963 minimap2 [23] and “reference” contig from assembly (Canu v1.8) with basecalled data

964 (FlipFlop). Stripes in this figure are not SNVs. They represent technical variability at

965 homopolymers. Assemblies were manually curated to start with 5' LTR in the sense orientation,

966 leaving the plasmid backbone on the left. Because there were not real insertions in the HIV

967 segment, the HIV coordinates are the same as HXB2 (both 9719 bp long). Compare with 52 bp

968 technical artifact from the core's short read assembly in **Supplemental Figure 4A, 4B.**

969



970 **Supplemental Figure 5: Homopolymers and dimer runs are ONT artifacts in unpolished**  
 971 **assemblies.**

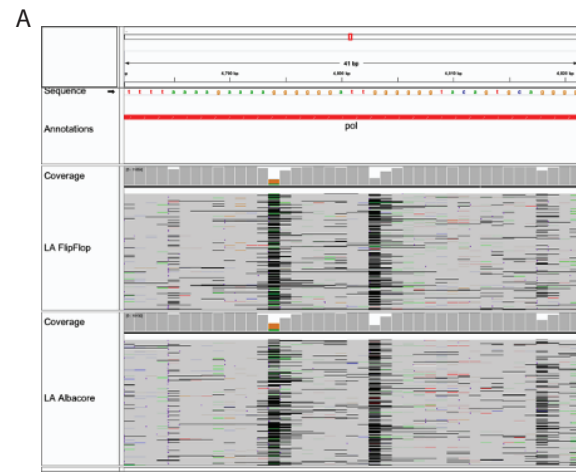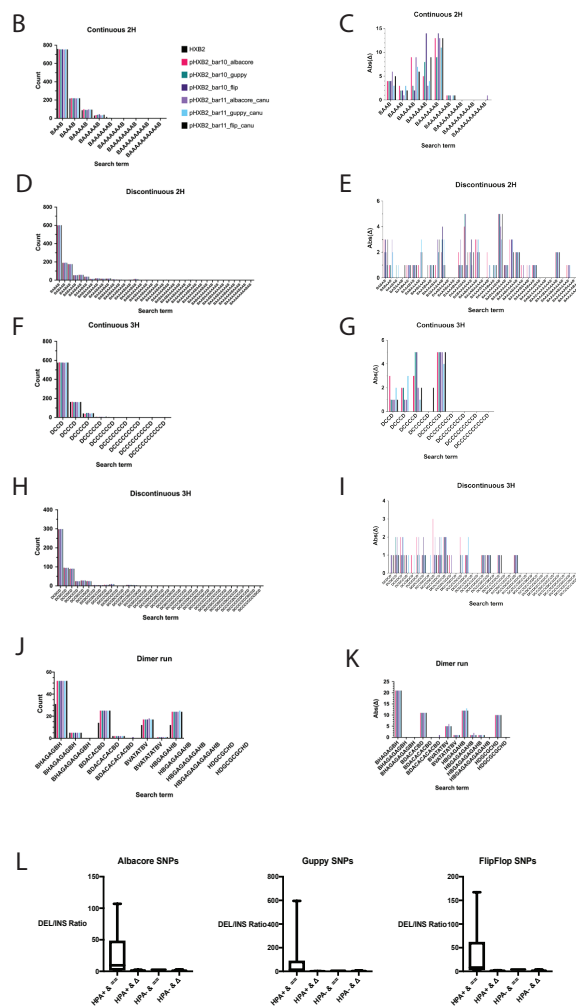

973 Supplemental Figure 5A: A set of homopolymer tracks from HXB2 plasmid. Alignments with  
974 BWA-MEM shown from FlipFlop (top) and Albacore (bottom) basecalled reads. Mapping is  
975 pre-assembly.

976 Supplemental Figure 5B: Continuous 2H counts in unpolished assemblies. 2H = A or T  
977 homodimers.

978 Supplemental Figure 5C: Continuous 2H Absolute Difference.

979 Supplemental Figure 5D: Discontinuous 2H counts in unpolished assemblies.

980 Supplemental Figure 5E: Discontinuous 2H Absolute Difference.

981 Supplemental Figure 5F: Continuous 3H counts in unpolished assemblies. 3H = C or G  
982 homodimers.

983 Supplemental Figure 5G: Continuous 3H Absolute Difference.

984 Supplemental Figure 5H: Discontinuous 3H counts in unpolished assemblies.

985 Supplemental Figure 5I: Discontinuous 3H Absolute Difference.

986 Supplemental Figure 5J: Dimer run counts in unpolished assemblies.

987 Supplemental Figure 5K: Dimer run Absolute Difference. Dimer runs as pairs are the most  
988 problematic, with runs as triplets being resolvable by ONT.

989 Supplemental Figure 5L: The ratio of deletions to insertions is higher at mismatches both  
990 adjacent to homopolymers and similar to neighbor bases. Box plot shows median (“x” is mean)  
991 and quartile ranges. Y-axis is ratio. HPA: homopolymer-adjacent. ==: same as neighbor base. Δ:  
992 different than neighbor base. Higher coverage (above ~10) usually makes up for current error  
993 profile. Above true for Albacore, Guppy, and FlipFlop.

994 **Supplemental Figure 6: Assembly partially resolved homopolymers, which are improved**  
995 **by polishing**

996

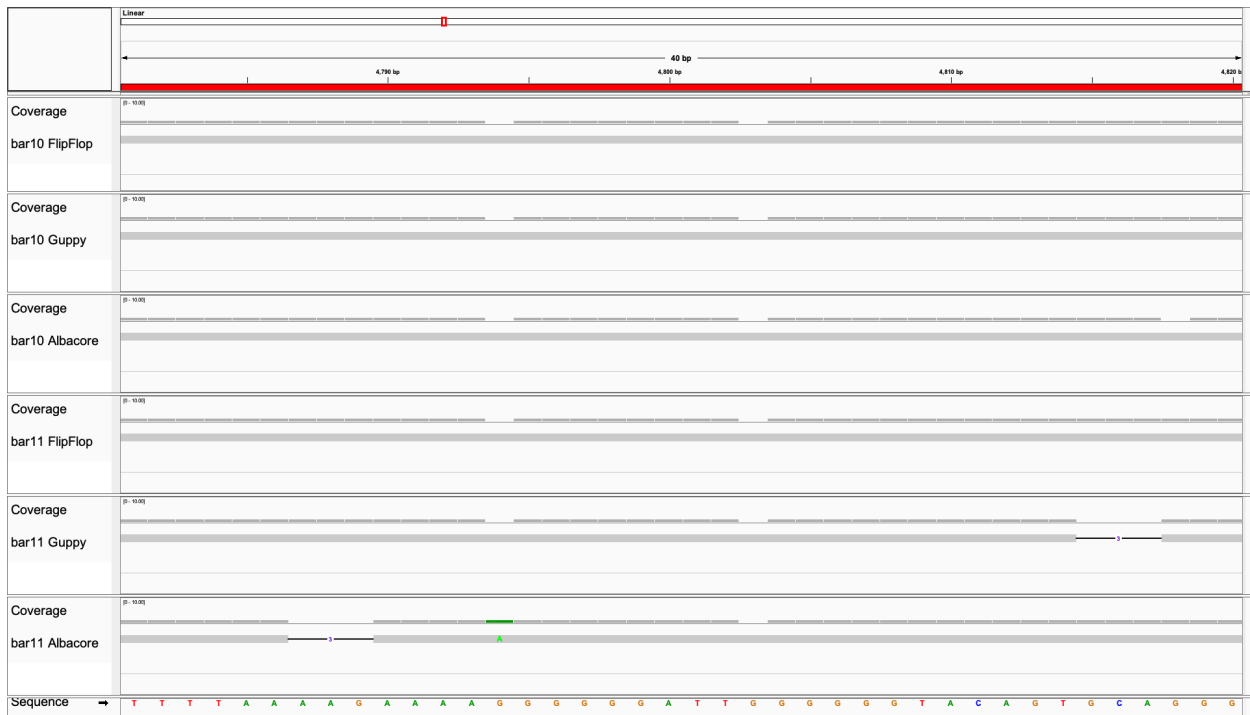

997

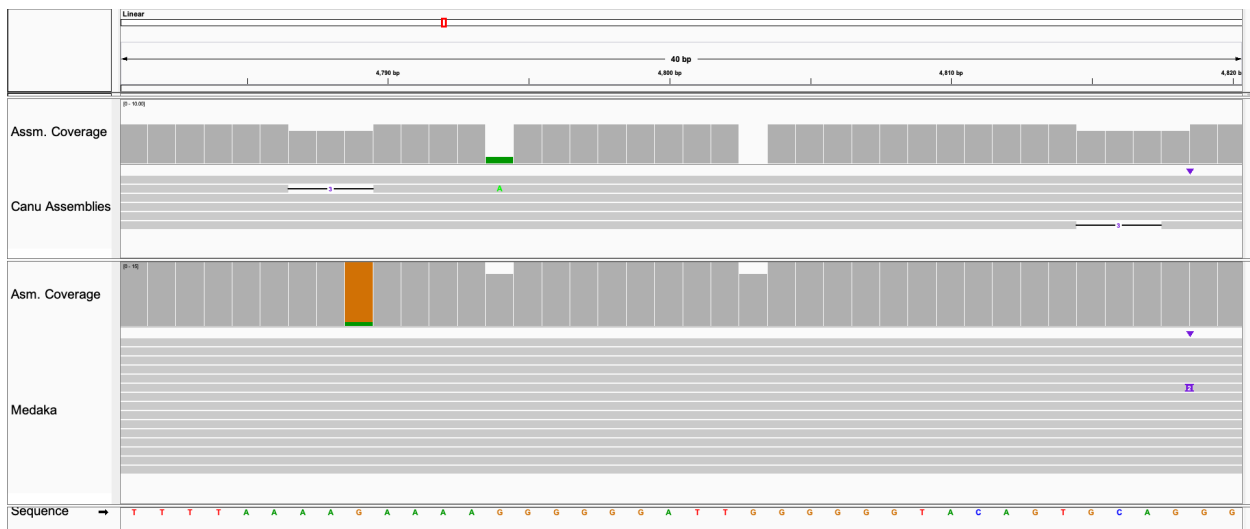

998 Top: Six ONT-only assemblies. Bottom: polished ONT-only assemblies, varying Medaka  
999 models. Deletions at 5' of G homopolymers were not corrected, regardless of basecaller or Taq  
1000 isoform. Note that polishing was not performed. IGV window is Linear:4,781-4,820. Bottom:

1001 polishing canu assemblies with medaka abrogated most ONT artifacts. Best medaka setting

1002 tested: r941\_min\_high\_g330.

1003
